# Supplementary material
Source: MDPI journal article supplement (https://www.mdpi.com/2073-4344/14/3/214)
Supplement: s1 [file s1]

Supporting Information

# Extended Hydrogen-Bonded Molybdenum Arrays Derived from Carboxylic Acids and Dianilines: ROP Capability of the Complexes and Parent Acids and Dianilines

William Clegg <sup>1</sup>, Mark R. J. Elsegood <sup>2</sup> and Carl Redshaw <sup>3,\*</sup>

<sup>1</sup> Chemistry, School of Natural and Environmental Sciences, Newcastle University, Newcastle upon Tyne NE1 7RU, UK; bill.clegg@ncl.ac.uk

<sup>2</sup> Chemistry Department, Loughborough University, Loughborough, LE11 3TU, UK; m.r.j.elsegood@lboro.ac.uk

<sup>3</sup> Plastics Collaboratory, Chemistry, School of Natural Sciences, University of Hull, Cottingham Road, Hull HU6 7RX, UK

\* Correspondence: c.redshaw@hull.ac.uk

| Contents                                                                       | Page |
|--------------------------------------------------------------------------------|------|
| <u>Complex characterization</u>                                                |      |
| <b>For 1:</b>                                                                  |      |
| <b>Figure S1.</b> IR spectrum of <b>1</b> .                                    | 3    |
| <b>Figure S2.</b> Different views of the molecular structures of <b>1</b> .    | 3    |
| <b>Figure S3.</b> MALDI-ToF spectrum of <b>1</b> .                             | 4    |
| <b>Figure S4.</b> <sup>1</sup> H NMR spectrum of aromatic region of <b>1</b> . | 4    |
| <b>For 2:</b>                                                                  |      |
| <b>Figure S5.</b> IR spectrum of <b>2</b> .                                    | 5    |
| <b>Figure S6.</b> Different views of the molecular structures of <b>2</b> .    | 5/6  |
| <b>Figure S7.</b> MALDI-ToF spectrum of <b>2</b> .                             | 6    |
| <b>For 3:</b>                                                                  |      |
| <b>Figure S8.</b> IR spectrum of <b>3</b> .                                    | 7    |
| <b>Figure S9.</b> Different views of the molecular structures of <b>3</b> .    | 7    |

**Figure S10.** MALDI-ToF spectrum of **3**.

7

### Ring opening polymerization

#### **For polycaprolactone**

**Figures S11 – S14.** Selected  $^1\text{H}$  NMR spectra for %conversion measurements. 8/9

**Figures S15 – S21.** Selected gpc traces. 9-13

**Figures S22 – S25.** Expansions of MALDI-ToF spectra of PCL obtained from **1 – 3**. 14/15

**Figure S26.** MALDI-ToF spectrum of PCL obtained using anthranilic acid. 16

**Figure S27.**  $^1\text{H}$  spectrum of PCL obtained using anthranilic acid. 17

#### **For polyvalerolactone**

**Figures S28 – S35.** Selected  $^1\text{H}$  NMR spectra for %conversion measurements. 17-19

**Figures S36 – S42.** Selected gpc traces. 20-25

**Figures S43 – S46.** Expansions of MALDI-ToF spectra of PCL obtained from **1 – 3**. 25/26

**Figure S47.** MALDI-ToF of PVL using  $[2,2'-(\text{NH}_2(\text{C}_6\text{H}_4))_2]$  (run 11, Table 5). 27/28

**Figure S48.** MALDI-ToF of PVL using  $[2,2'-(\text{NH}_2)\text{C}_6\text{H}_4]_2\text{CH}_2$  (run 12, Table 5). 29

**Figure S49.** MALDI-ToF of PVL using  $[2,2'-(\text{NH}_2)\text{C}_6\text{H}_4]_2\text{CH}_2\text{CH}_2$  (run 13, Table 5). 30

**Figure S50.** MALDI-ToF spectrum of PVL obtained using anthranilic acid. 31

**Figure S51.**  $^1\text{H}$  NMR spectrum for PVL using anthranilic acid 32

#### **Catalyst stability**

**Figure S52.** TGA for **2·3MeCN** 32

**Figure S53.** DSC for **2·3MeCN** 33

**Figure S54.** TGA for **II**. 33

**Figure S55.** DSC for **II**. 33

### Complex characterization

**For 1:**

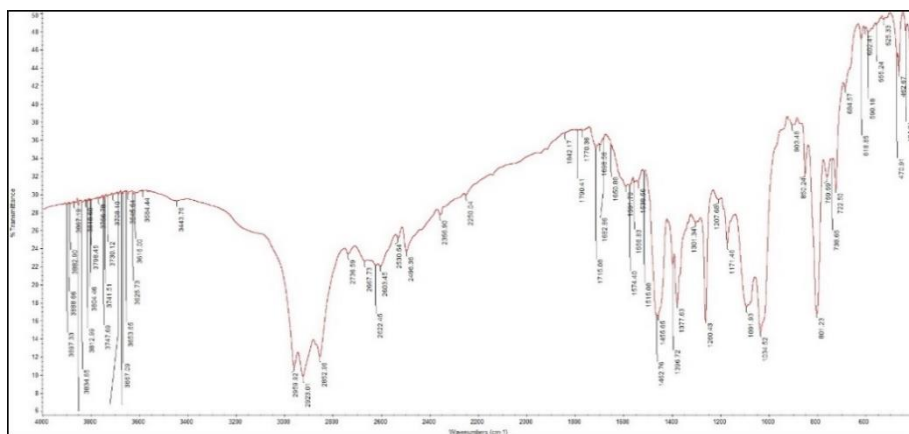

**Figure S1.** IR spectrum of **1**.

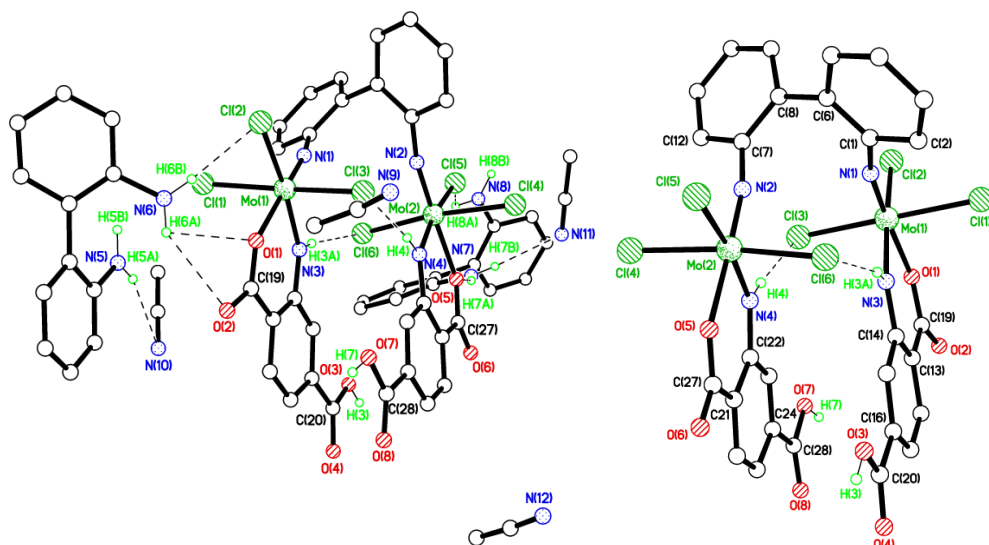

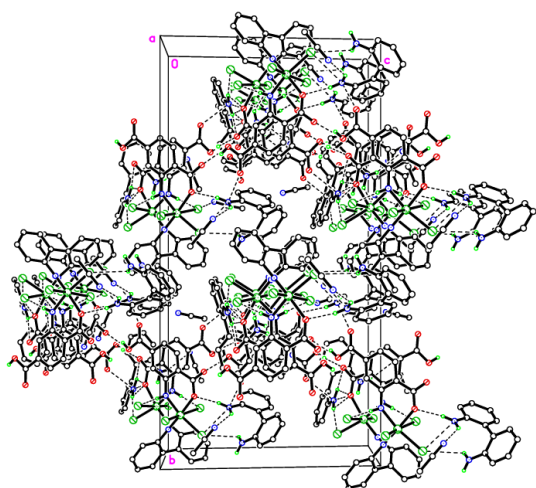

**Figure S2.** Three different views of  $1 \cdot 2[2,2'\text{-NH}_2(\text{C}_6\text{H}_4)]_2 \cdot 3.5\text{MeCN}$

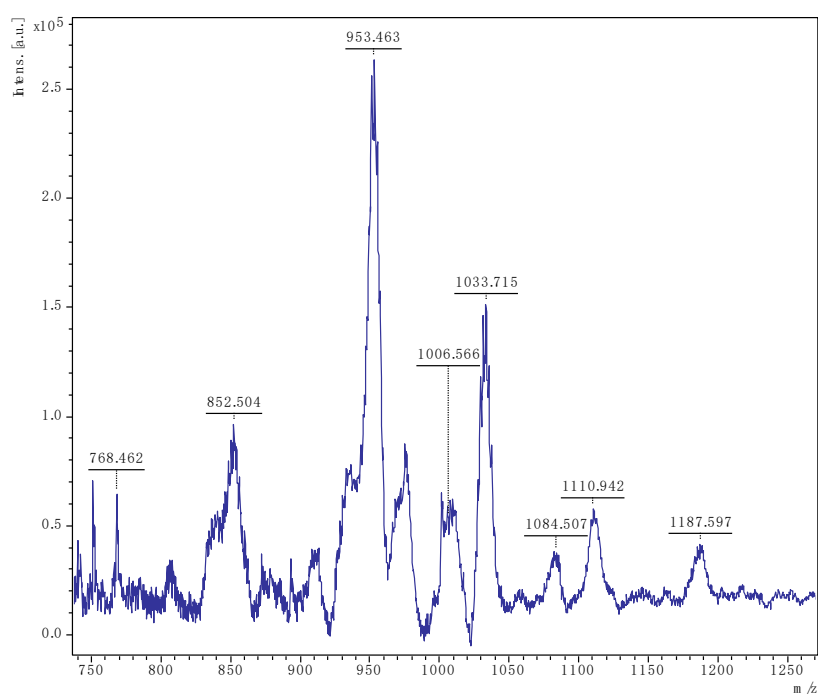

**Figure S3.** MALDI-ToF mass spectrum of **1**.

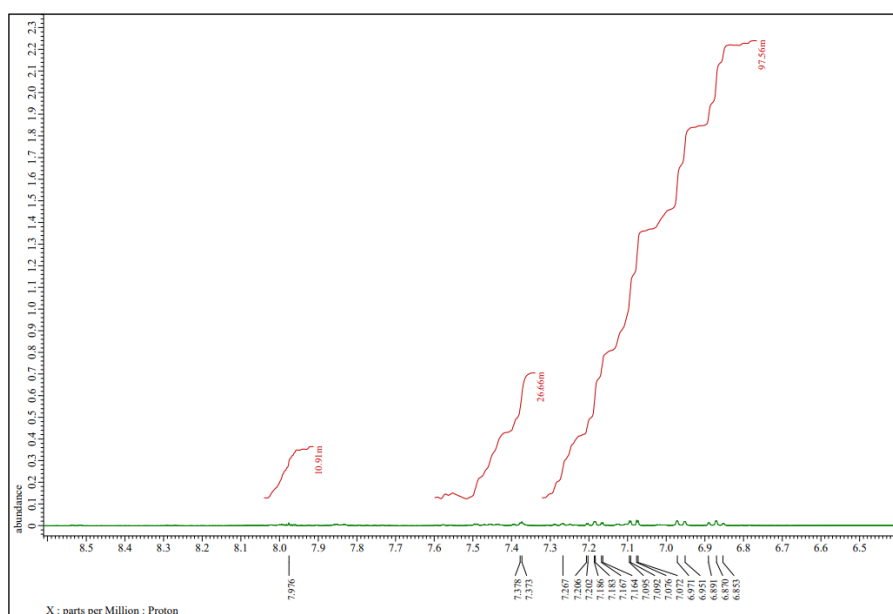

**Figure S4.** <sup>1</sup>H NMR spectrum of aromatic region of **1** (400 MHz, CD<sub>3</sub>CN, 298K) showing weak peaks for the H<sub>2</sub>NC<sub>6</sub>H<sub>3</sub>-1,4-(CO<sub>2</sub>H)<sub>2</sub> and [2,2'-NH<sub>2</sub>(C<sub>6</sub>H<sub>4</sub>)]<sub>2</sub> derived protons.

For **2**:

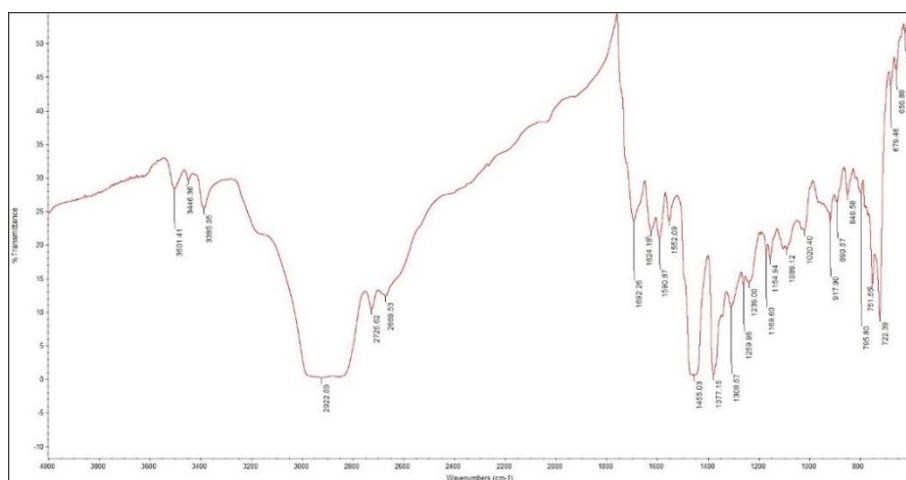

**Figure S5.** IR spectrum of **2**.

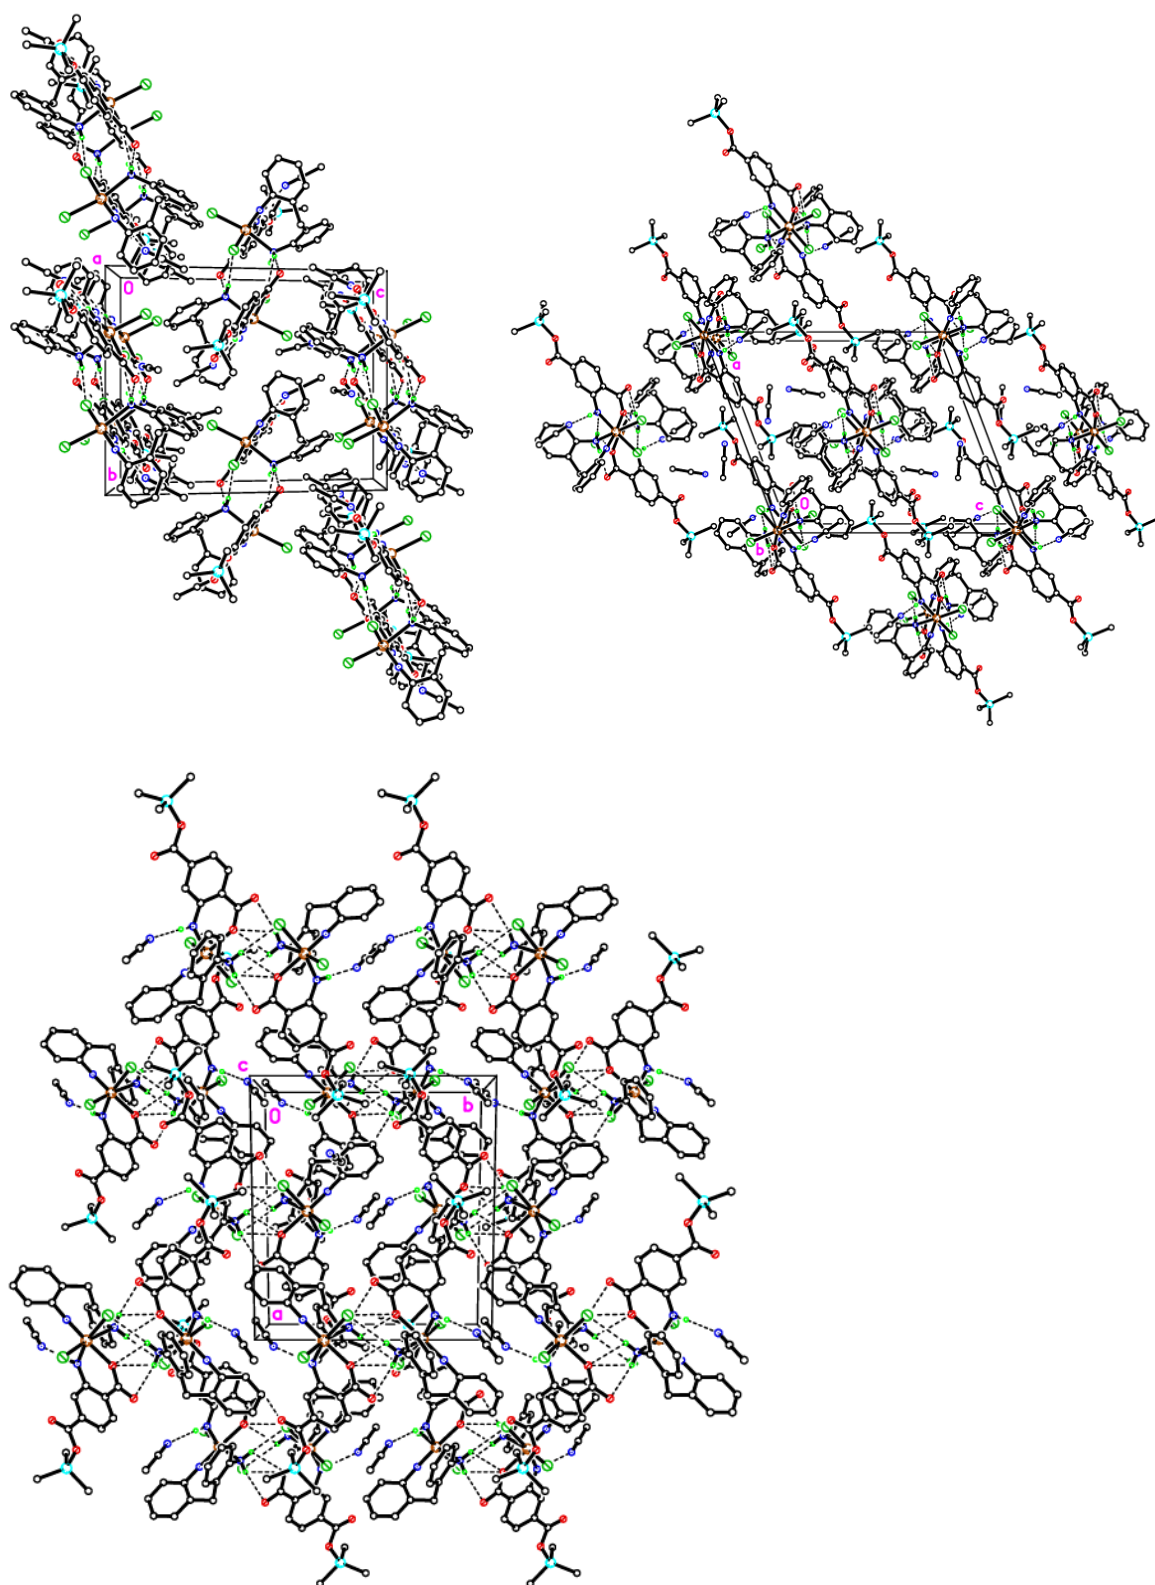

**Figure S6.** Three different views of the packing in 2·3MeCN.

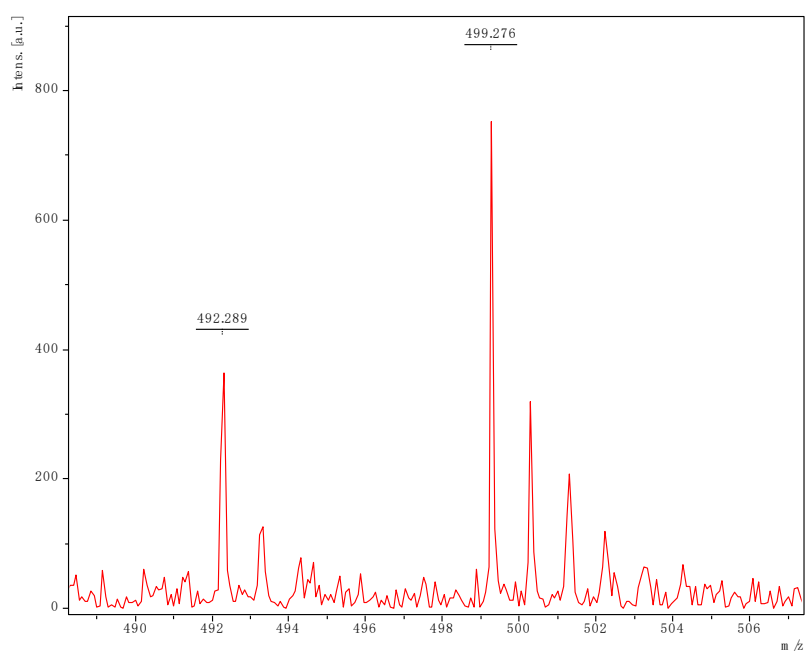

**Figure S7.** MALDI-ToF mass spectrum of **2**.

**For 3:**

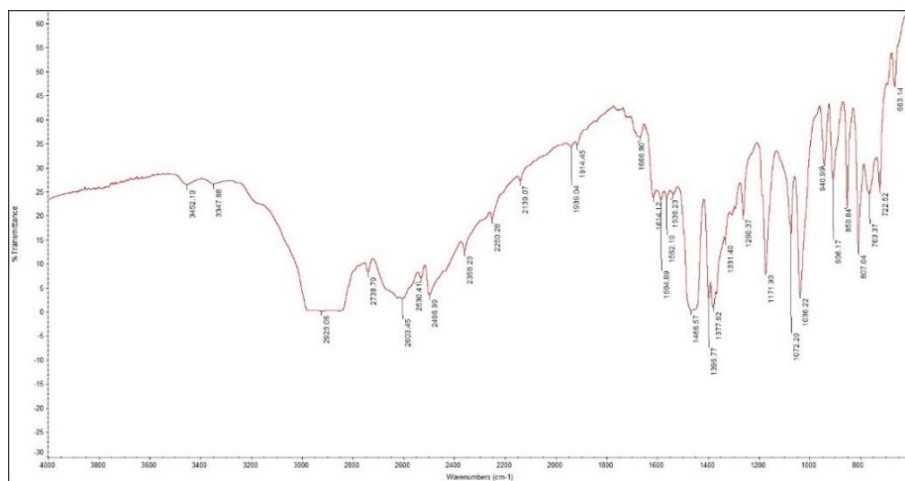

**Figure S8.** IR spectrum of **3**.

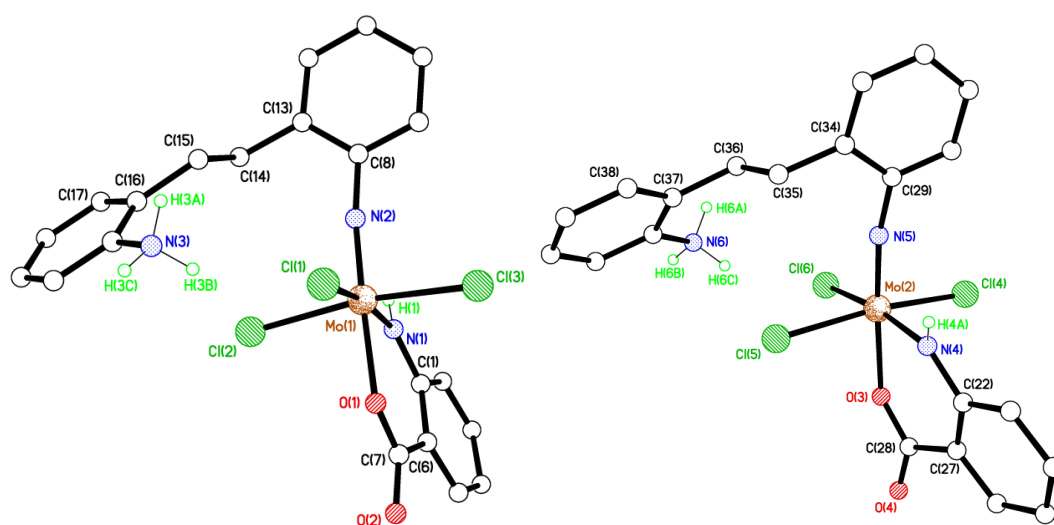

**Figure S9.** Different views of the two unique molecules in **3**·MeCN with MeCNs omitted for clarity.

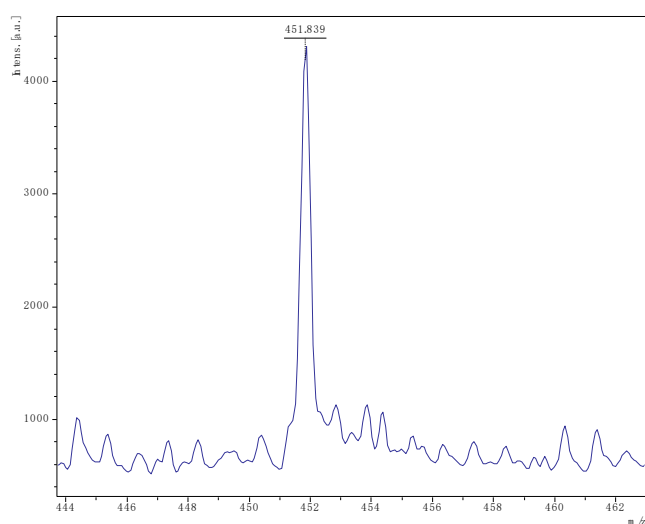

**Figure S10.** MALDI-ToF mass spectrum of **3**.

## Ring opening polymerization

*For polycaprolactone*





**Figure S14.**  $^1\text{H}$  NMR spectrum and % conversion for PCL using **I** under air (entry 8, Table 4).

*Selected gpc traces of the PCL polymers.*

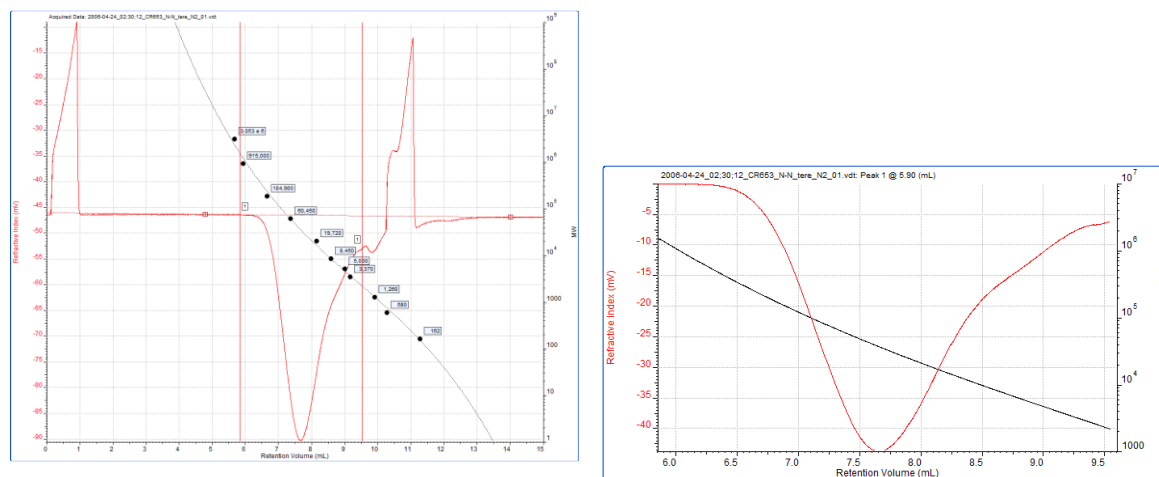

**Peak 1**

Ret Vol (mL) 5.897  
 $M_n$  (Da) 14,837  
 $M_w$  (Da) 41,231  
 $M_z$  (Da) 90,914  
 $M_p$  (Da) 1.344 e 6  
 $M_w/M_n$  2.779  
 % Above 0 100.0000  
 % Below 0 0.0000  
 Wt Fr (Peak) 1.0000  
 RI Area (mVmL) -64.37  
 UV Area (mVmL) 0.00  
 Method File Calibration01042019-0016.vcm  
 Solvent THF  
 Date Acquired Apr 24, 2006 - 02:30:12  
 Acquisition Operator admin : Administrator  
 Calculation Operator admin : Administrator  
 Column Set GMHxl  
 System System 1  
 Flow Rate (ml/min) 1.0000  
 Injection Volume (ul) 100.0  
 Volume Increment (mL) 0.0033  
 Detector Temp (C) 22.00  
 Column Temp (C) 22.00  
 OmniSEC Version 467

**Figure S15.** GPC trace for PCL using **1** under  $\text{N}_2$  (run 1, Table 4)

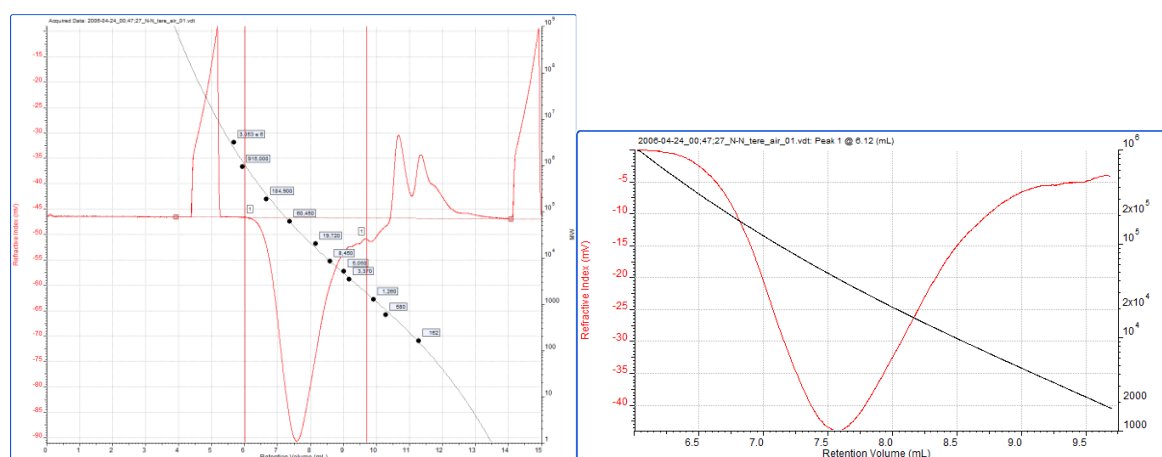

## Peak 1

Ret Vol (mL) 6.120

 $M_n$  (Da) 16,584 $M_w$  (Da) 49,787 $M_z$  (Da) 112,107 $M_p$  (Da) 783,424 $M_w/M_n$  3.002

% Above 0 100.0000

% Below 0 0.0000

Wt Fr (Peak) 1.0000

RI Area (mVmL) -62.51

UV Area (mVmL) 0.00

Method File Calibration01042019-0016.vcm

Solvent THF

Date Acquired Apr 24, 2006 - 00:47:27

Acquisition Operator admin : Administrator

Calculation Operator admin : Administrator

Column Set GMHxl

System System 1

Flow Rate (ml/min) 1.0000

Injection Volume (ul) 100.0

Volume Increment (mL) 0.0033

Detector Temp (C) 22.00

Column Temp (C) 22.00

OmniSEC Version 467

**Figure S16.** GPC trace for PCL using **1** under air (run 2, Table 4)

## Peak 1

Ret Vol (mL) 6.227

|            |        |
|------------|--------|
| $M_n$ (Da) | 56,525 |
|------------|--------|

|            |         |
|------------|---------|
| $M_w$ (Da) | 207,117 |
|------------|---------|

*Mz* (Da) 350,843

*M<sub>p</sub>* (Da)      604,726

|           |       |
|-----------|-------|
| $M_w/M_n$ | 3.664 |
|-----------|-------|

|           |          |
|-----------|----------|
| % Above 0 | 100.0000 |
|-----------|----------|

|           |        |
|-----------|--------|
| % Below 0 | 0.0000 |
|-----------|--------|

Wt Fr (Peak) 1.0000

|                |         |
|----------------|---------|
| RI Area (mVmL) | -107.00 |
|----------------|---------|

|                 |      |
|-----------------|------|
| UV Area (mV/mL) | 0.00 |
|-----------------|------|

Method File Calibration01042019-0016.vcm

|         |     |
|---------|-----|
| Solvent | THF |
|---------|-----|

Date Acquired Apr 24, 2006 - 02:07:29

Acquisition Operator      admin : Administrator

|                      |                       |
|----------------------|-----------------------|
| Calculation Operator | admin : Administrator |
|----------------------|-----------------------|

Column Set GMHxl

|        |          |
|--------|----------|
| System | System 1 |
|--------|----------|

Flow Rate (ml/min) 1.0000

Injection Volume (ul) 100.0

Volume Increment (mL) 0.0033

Detector Temp (C) 22.00

Column Temp (C) 22.00

OmniSEC Version 467

**Figure S17.** GPC trace for PCL using **3** under N<sub>2</sub> (run 5, Table 4).

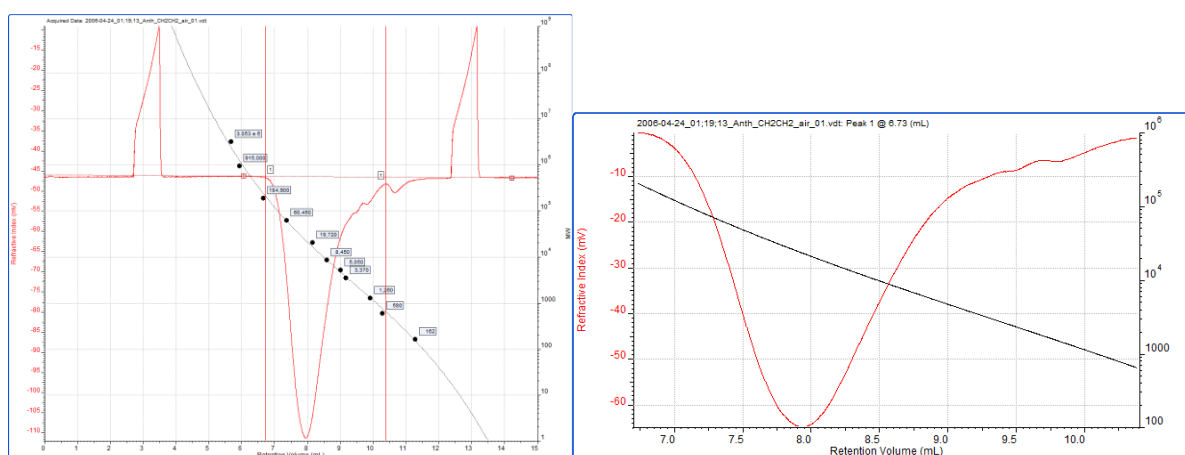

## Peak 1

Ret Vol (mL) 6.733

 $M_n$  (Da) 34,199 $M_w$  (Da) 97,159 $M_z$  (Da) 131,255 $M_p$  (Da) 201,292 $M_w/M_n$  2.841

% Above 0 100.0000

% Below 0 0.0000

Wt Fr (Peak) 1.0000

RI Area (mVmL) -86.62

UV Area (mVmL) 0.00

Method File Calibration01042019-0016.vcm

Solvent THF

Date Acquired Apr 24, 2006 - 01:19:13

Acquisition Operator admin : Administrator

Calculation Operator admin : Administrator

Column Set GMHxl

System System 1

Flow Rate (ml/min) 1.0000

Injection Volume (ul) 100.0

Volume Increment (mL) 0.0033

Detector Temp (C) 22.00

Column Temp (C) 22.00

OmniSEC Version 467

**Figure S18.** GPC trace for PCL using **3** under air (run 6, Table 4).

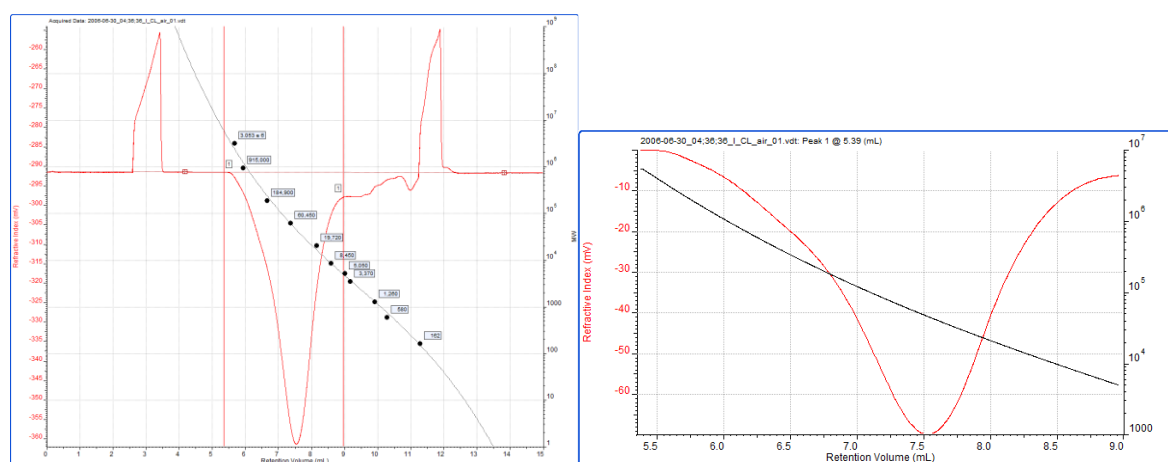

## Peak 1

Ret Vol (mL) 5.393

 $M_n$  (Da) 34,105 $M_w$  (Da) 123,114 $M_z$  (Da) 572,681 $M_p$  (Da) 5.198 e 6 $M_w/M_n$  3.610

% Above 0 100.0000

% Below 0 0.0000

Wt Fr (Peak) 1.0000

RI Area (mVmL) -97.52

UV Area (mVmL) 0.00

Method File Calibration01042019-0016.vcm

Solvent THF

Date Acquired Jun 30, 2006 - 04:36:36

Acquisition Operator admin : Administrator

Calculation Operator admin : Administrator

Column Set GMHxl

System System 1

Flow Rate (ml/min) 1.0000

Injection Volume (ul) 100.0

Volume Increment (mL) 0.0033

Detector Temp (C) 22.00

Column Temp (C) 22.00

OmniSEC Version 467

**Figure S19.** GPC trace for PCL using **I** under air (run 8, Table 4).

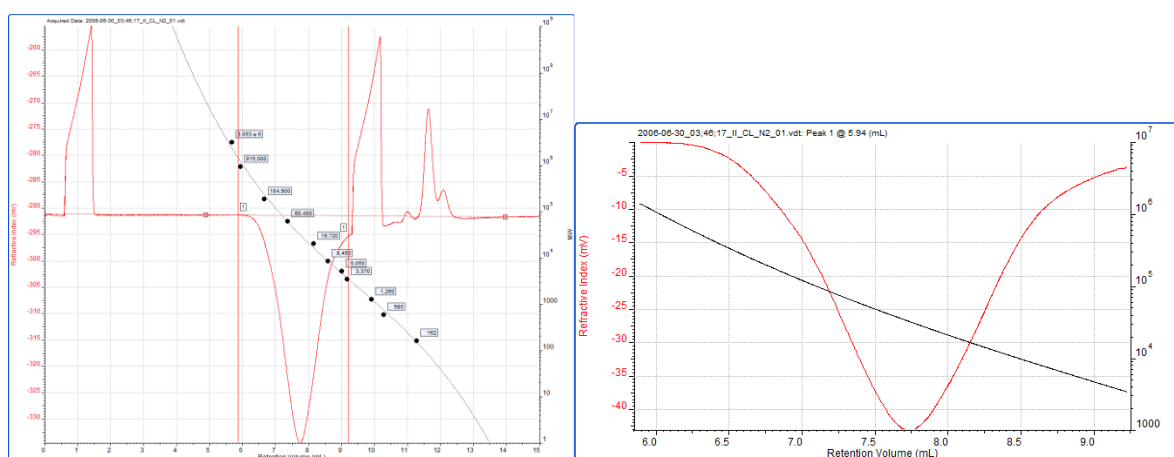

## Peak 1

Ret Vol (mL) 5.937

 $M_n$  (Da) 21,032 $M_w$  (Da) 47,483 $M_z$  (Da) 108,384 $M_p$  (Da) 1.216 e 6 $M_w/M_n$  2.258

% Above 0 100.0000

% Below 0 0.0000

Wt Fr (Peak) 1.0000

RI Area (mVmL) -55.38

UV Area (mVmL) 0.00

Method File Calibration01042019-0016.vcm

Solvent THF

Date Acquired Jun 30, 2006 - 03:46:17

Acquisition Operator admin : Administrator

Calculation Operator admin : Administrator

Column Set GMHxl

System System 1

Flow Rate (ml/min) 1.0000

Injection Volume (ul) 100.0

Volume Increment (mL) 0.0033

Detector Temp (C) 22.00

Column Temp (C) 22.00

OmniSEC Version 467

**Figure S20.** GPC trace for PCL using **II** under N<sub>2</sub> (run 9, Table 4).

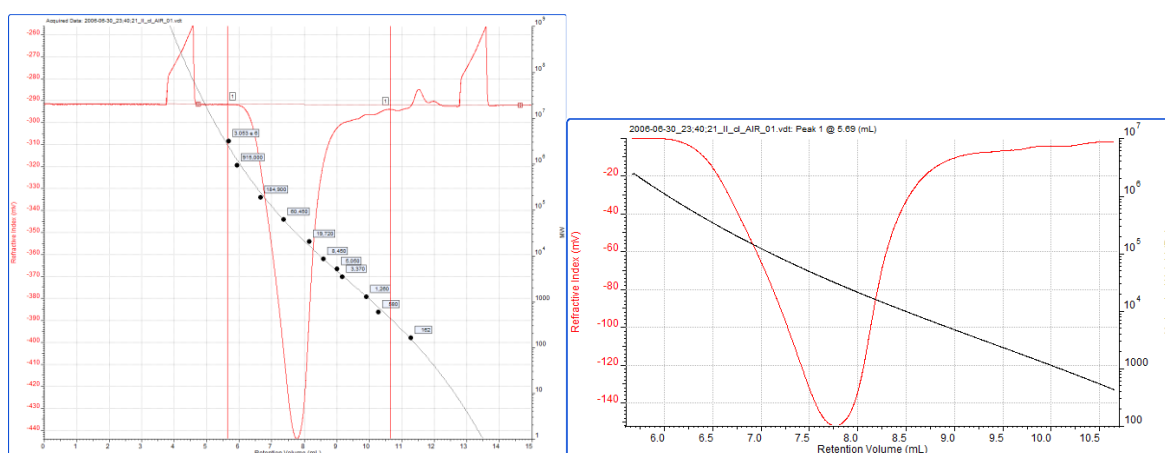

## Peak 1

Ret Vol (mL) 5.690

 $M_n$  (Da) 15,626 $M_w$  (Da) 57,725 $M_z$  (Da) 152,416 $M_p$  (Da) 2.294 e 6 $M_w/M_n$  3.694

% Above 0 100.0000

% Below 0 0.0000

Wt Fr (Peak) 1.0000

RI Area (mVmL) -200.06

UV Area (mVmL) 0.00

Method File Calibration01042019-0016.vcm

Solvent THF

Date Acquired Jun 30, 2006 - 23:40:21

Acquisition Operator admin : Administrator

Calculation Operator admin : Administrator

Column Set GMHxl

System System 1

Flow Rate (ml/min) 1.0000

Injection Volume (ul) 100.0

Volume Increment (mL) 0.0033

Detector Temp (C) 22.00

Column Temp (C) 22.00

OmniSEC Version 467

**Figure S21.** GPC trace for PCL using **II** under air (run 10, Table 4).*Expansions of MALDI-ToF spectra of the PCL obtained from 1 - 3*



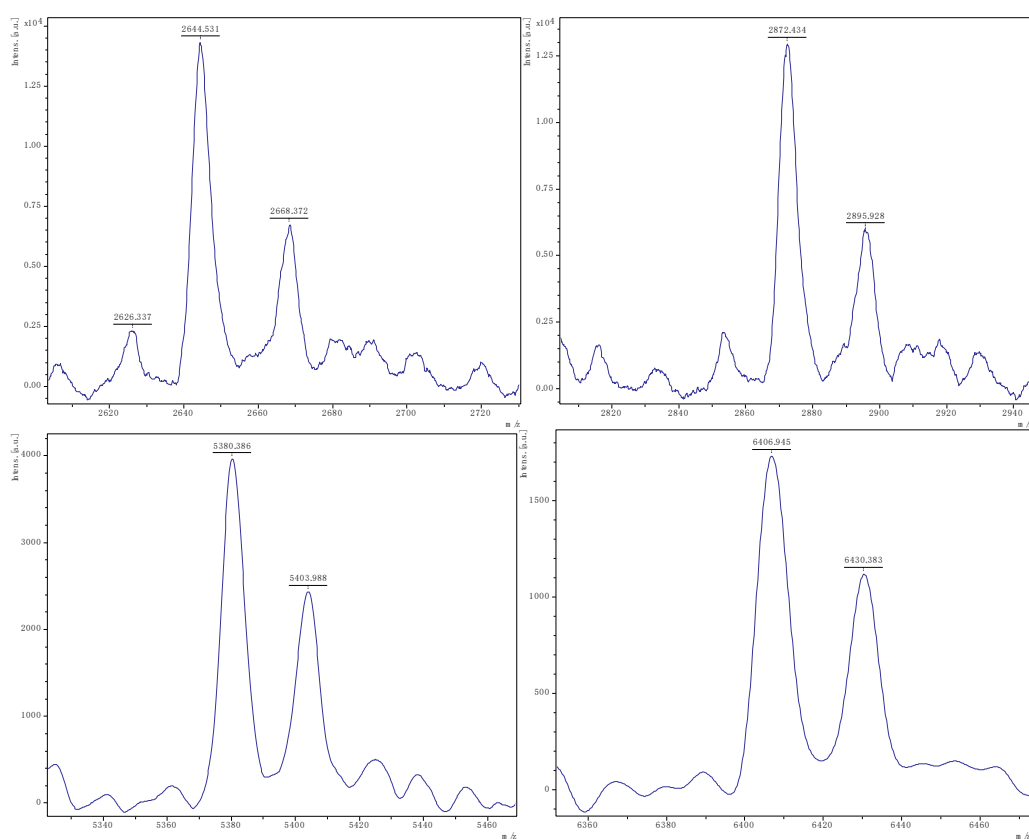

**Figure S22.** Expansions of the PCL using **1** (Entry 1, Table 4).

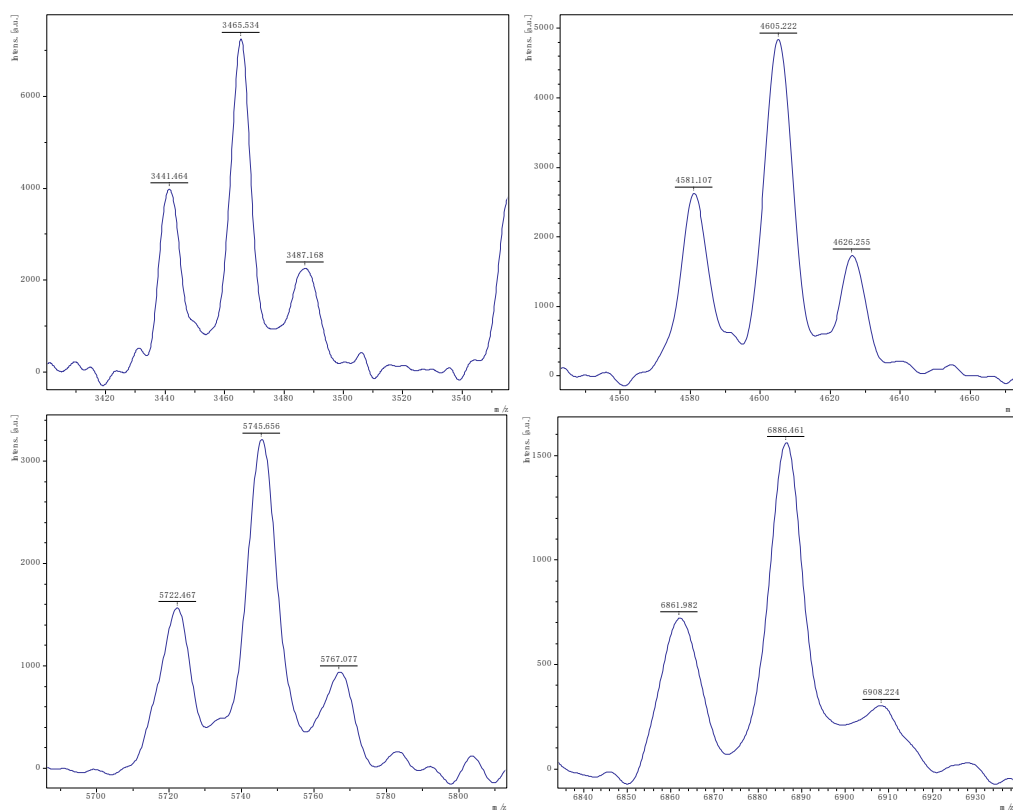

**Figure S23.** Expansions of the PCL using **1** (Entry 2, Table 4).

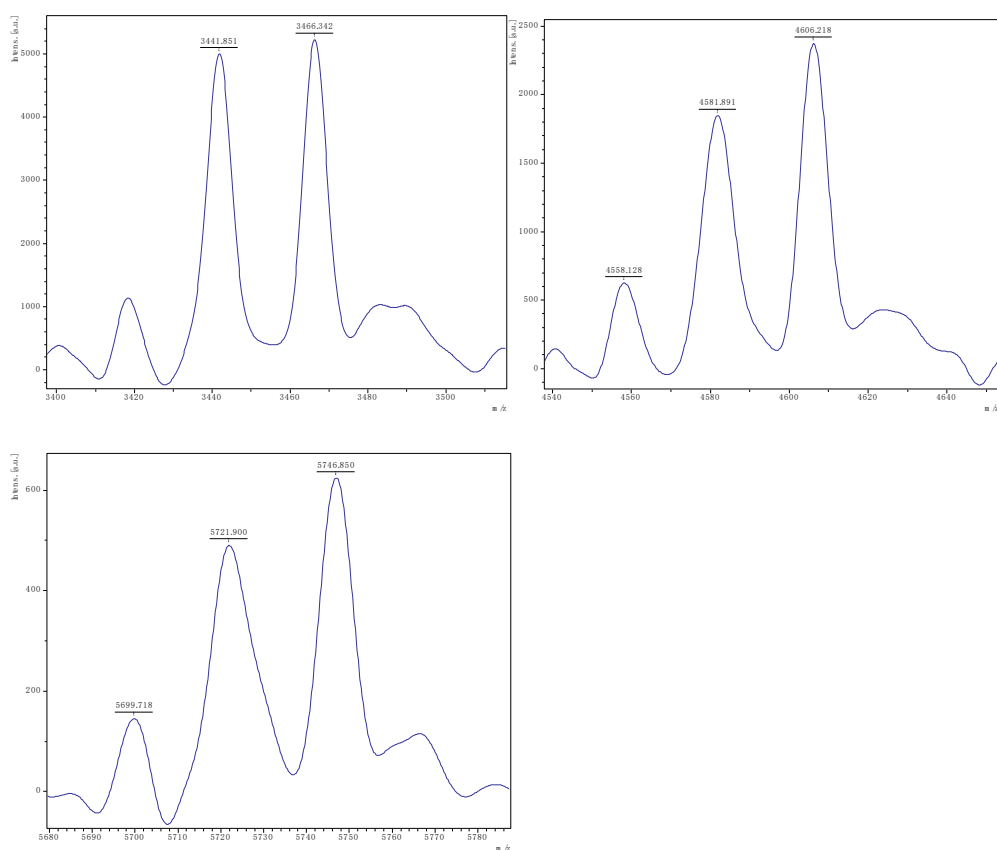

**Figure S24.** Expansions of the PCL using 2 (Entry 3, Table 4).

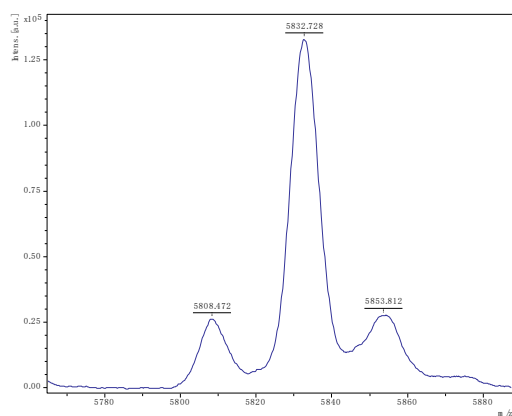

**Figure S25.** Expansions of the PCL using 3 (Entry 5, Table 4).

*Spectra of PCL obtained using anthranilic acid*

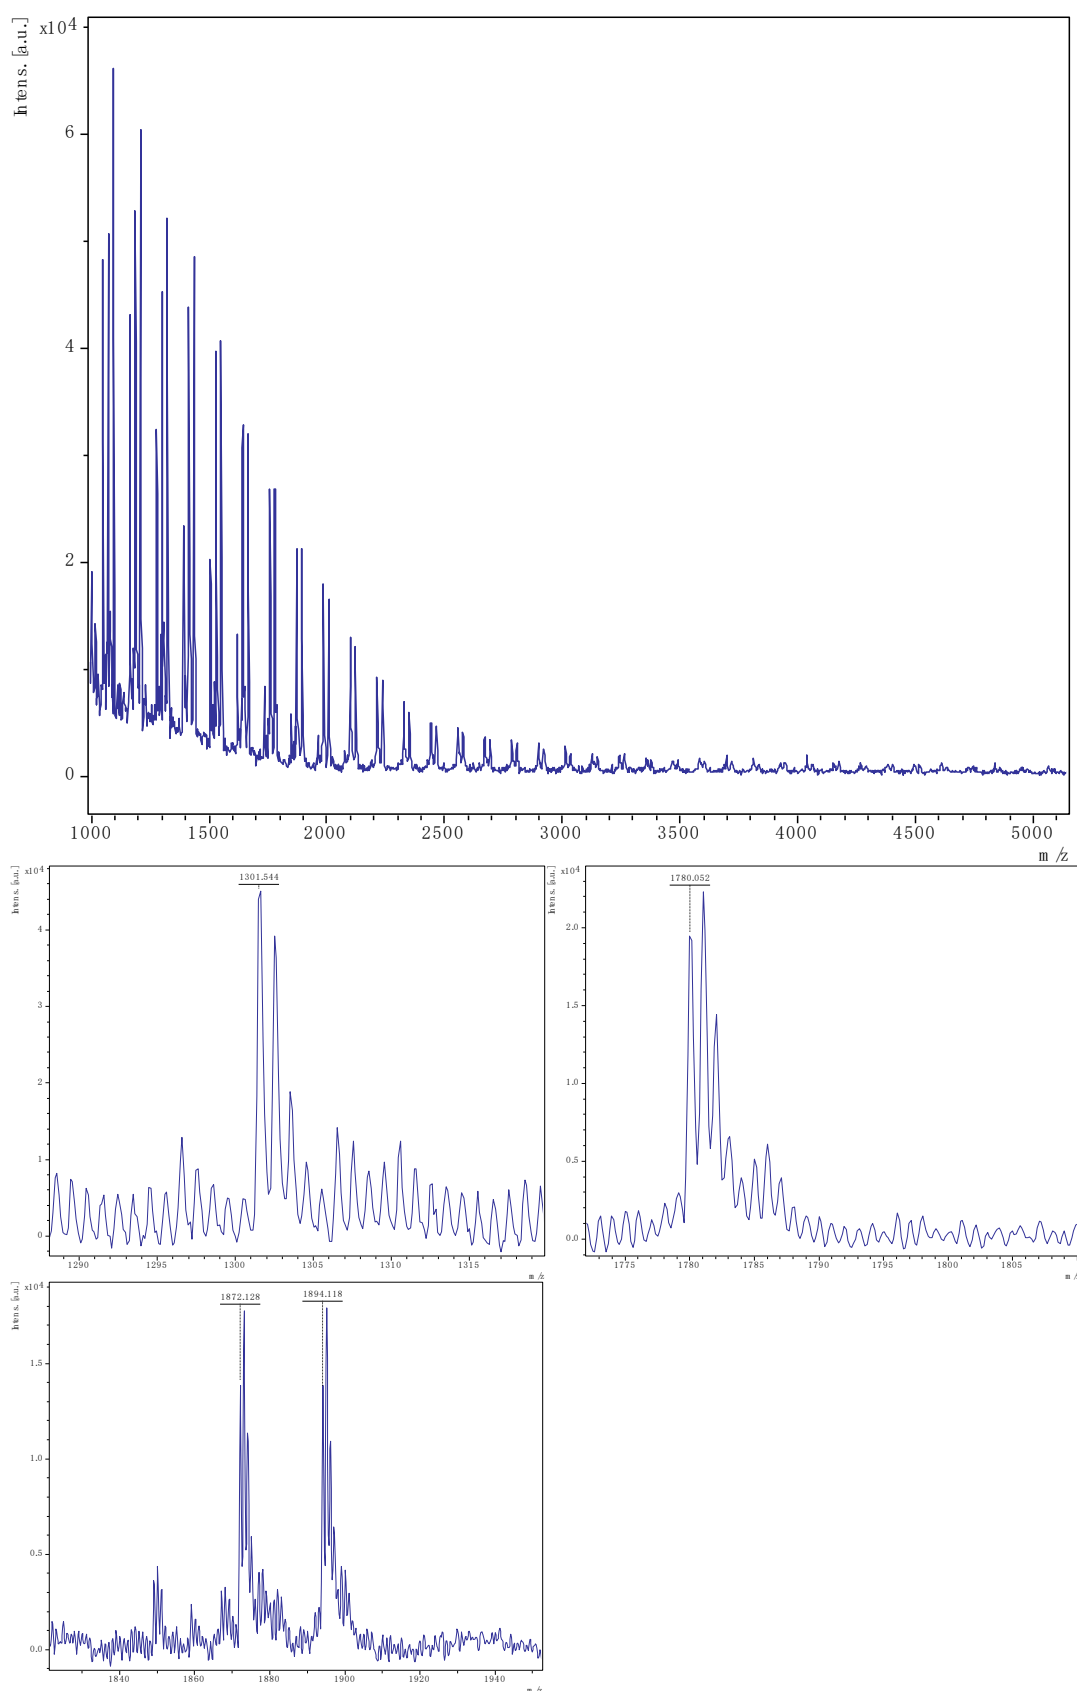

**Figure S26.** MALDI-ToF of PCL using 1,2-(NH<sub>2</sub>)(CO<sub>2</sub>H)C<sub>6</sub>H<sub>4</sub> (run 14, Table 4).

The main families are i) polymer (terminated by OH/OMe) as potassium adducts  $[M = 31 \text{ (OMe)} + 1(\text{H}) + n \times 114.14 \text{ (CL)} + 39.1 \text{ (K}^+)]$  (e.g.,  $n = 15$  calc. 1783.2, obsv. 1780.1 with peaks off-set by 3.1 Da;

ii) polymers (terminated by OH/1,2-(NH<sub>2</sub>)(CO<sub>2</sub>)C<sub>6</sub>H<sub>4</sub> as the sodium adducts e.g., n = 10 calc. 1301.5, obsv. 1301.6, n = 15 calc. 1872.2, obsv. 1872.1).

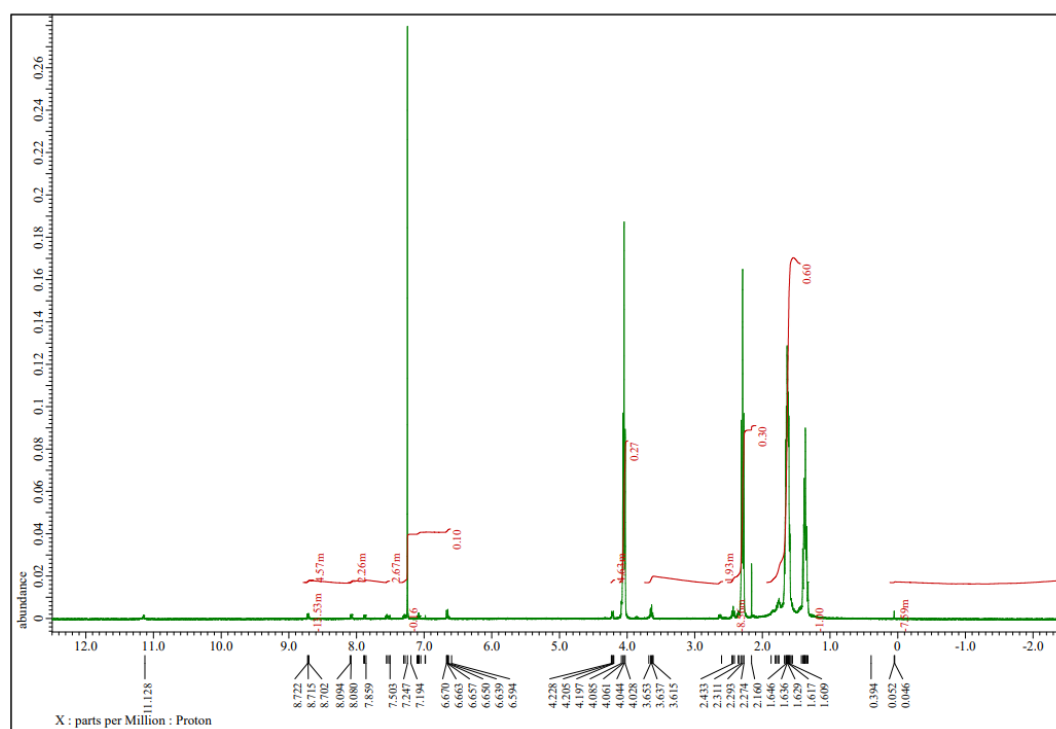

**Figure S27.** <sup>1</sup>H NMR spectrum of PCL using 1,2-(NH<sub>2</sub>)(CO<sub>2</sub>H)C<sub>6</sub>H<sub>4</sub> (run 14, Table 4).

*For polyvalerolactone*

**Figure S31.**  $^1\text{H}$  NMR spectrum and % conversion for PVL using **3** under air (entry 6, Table 5).

**Figure S34.**  $^1\text{H}$  NMR spectrum and % conversion for PVL using  $[2,2'-(\text{NH}_2)\text{C}_6\text{H}_4]_2\text{CH}_2$  under air (entry 12, Table 5).

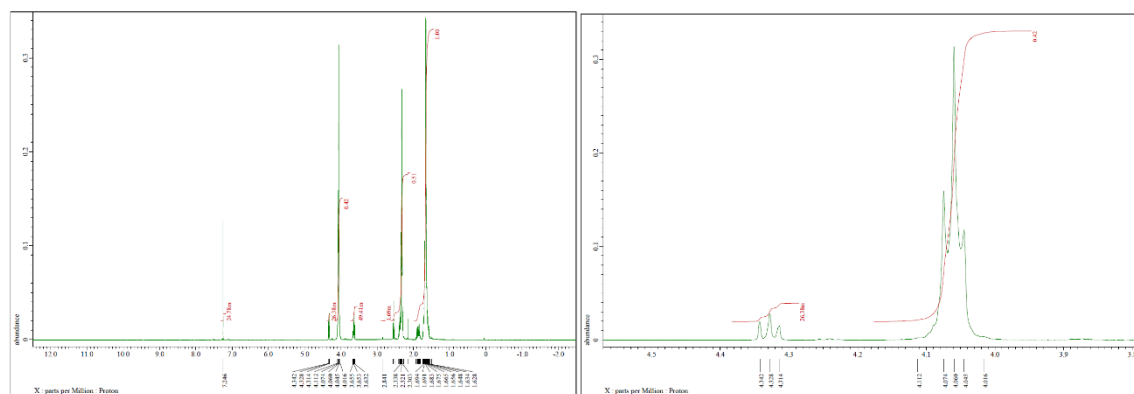

**Figure S35.**  $^1\text{H}$  NMR spectrum and % conversion for PVL using  $[2,2'-(\text{NH}_2)\text{C}_6\text{H}_4]_2\text{CH}_2\text{CH}_2$  under air (entry 13, Table 5).

*Selected gpc traces of the PVL polymers.*

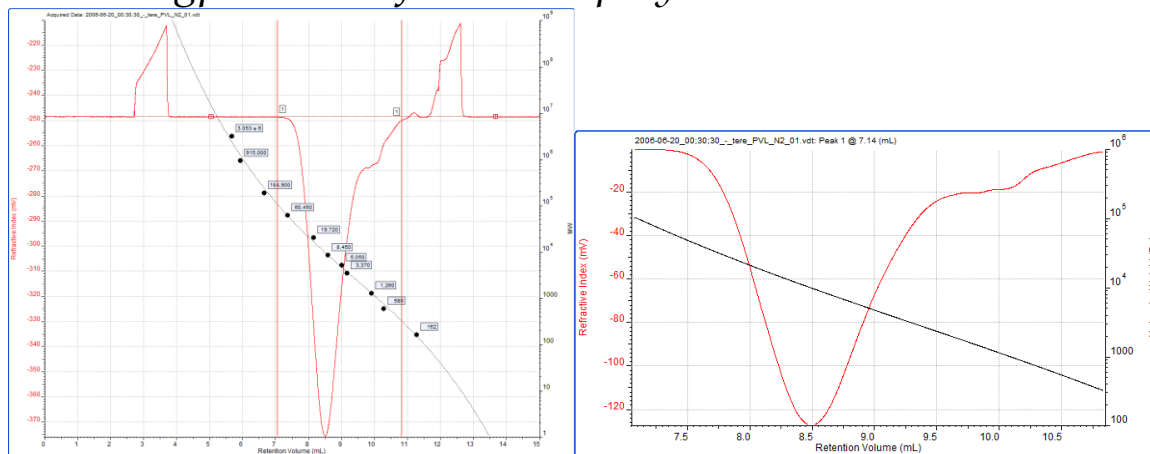

Peak 1

Ret Vol (mL) 7.143

|            |        |
|------------|--------|
| $M_n$ (Da) | 22,156 |
|------------|--------|

|            |        |
|------------|--------|
| $M_w$ (Da) | 52,685 |
|------------|--------|

*Mz* (Da)      67,957

$M_p$  (Da)      89,474

|           |       |
|-----------|-------|
| $M_w/M_n$ | 2.378 |
|-----------|-------|

|           |          |
|-----------|----------|
| % Above 0 | 100.0000 |
|-----------|----------|

|           |        |
|-----------|--------|
| % Below 0 | 0.0000 |
|-----------|--------|

Wt Fr (Peak) 1.0000

|                |         |
|----------------|---------|
| RI Area (mVmL) | -150.13 |
|----------------|---------|

UV Area (mV/mL) 0.00

Method File Calibration01042019-0016.vcm

Solvent THF  
 Date Acquired Jun 20, 2006 - 00:30:30  
 Acquisition Operator admin : Administrator  
 Calculation Operator admin : Administrator  
 Column Set GMHxl  
 System System 1  
 Flow Rate (ml/min) 1.0000  
 Injection Volume (ul) 100.0  
 Volume Increment (mL) 0.0033  
 Detector Temp (C) 22.00  
 Column Temp (C) 22.00  
 OmniSEC Version 467

**Figure S36.** GPC trace for PVL using **1** under N<sub>2</sub> (run 1, Table 5).

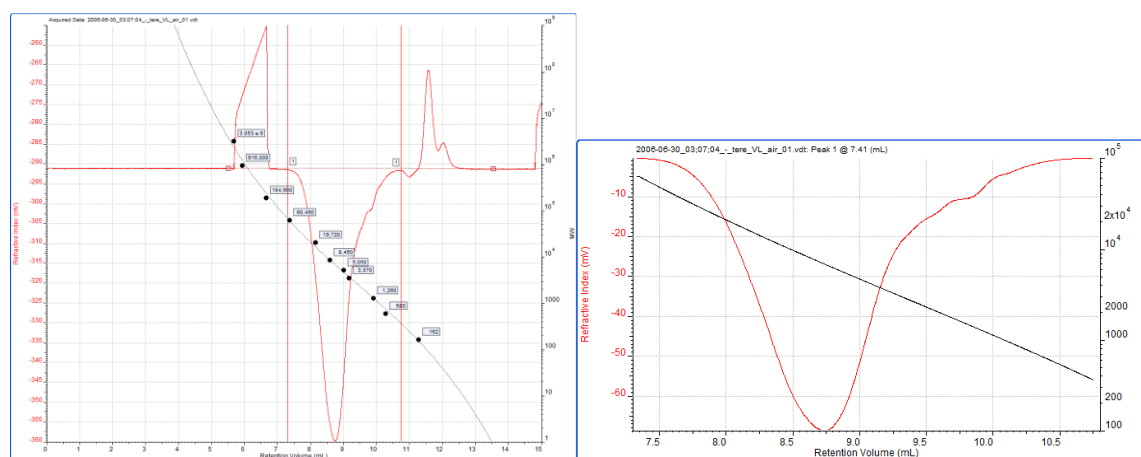

Peak 1

Ret Vol (mL) 7.410  
 $M_n$  (Da) 29,318  
 $M_w$  (Da) 40,580  
 $M_z$  (Da) 46,360  
 $M_p$  (Da) 55,052  
 $M_w/M_n$  1.384  
 % Above 0 100.0000  
 % Below 0 0.0000  
 Wt Fr (Peak) 1.0000  
 RI Area (mVmL) -74.91  
 UV Area (mVmL) 0.00

Method File Calibration01042019-0016.vcm  
 Solvent THF  
 Date Acquired Jun 30, 2006 - 03:07:04  
 Acquisition Operator admin : Administrator  
 Calculation Operator admin : Administrator  
 Column Set GMHxl  
 System System 1  
 Flow Rate (ml/min) 1.0000  
 Injection Volume (ul) 100.0  
 Volume Increment (mL) 0.0033  
 Detector Temp (C) 22.00  
 Column Temp (C) 22.00



Figure S37. GPC trace for PVL using 1 under air (run 2, Table 5).

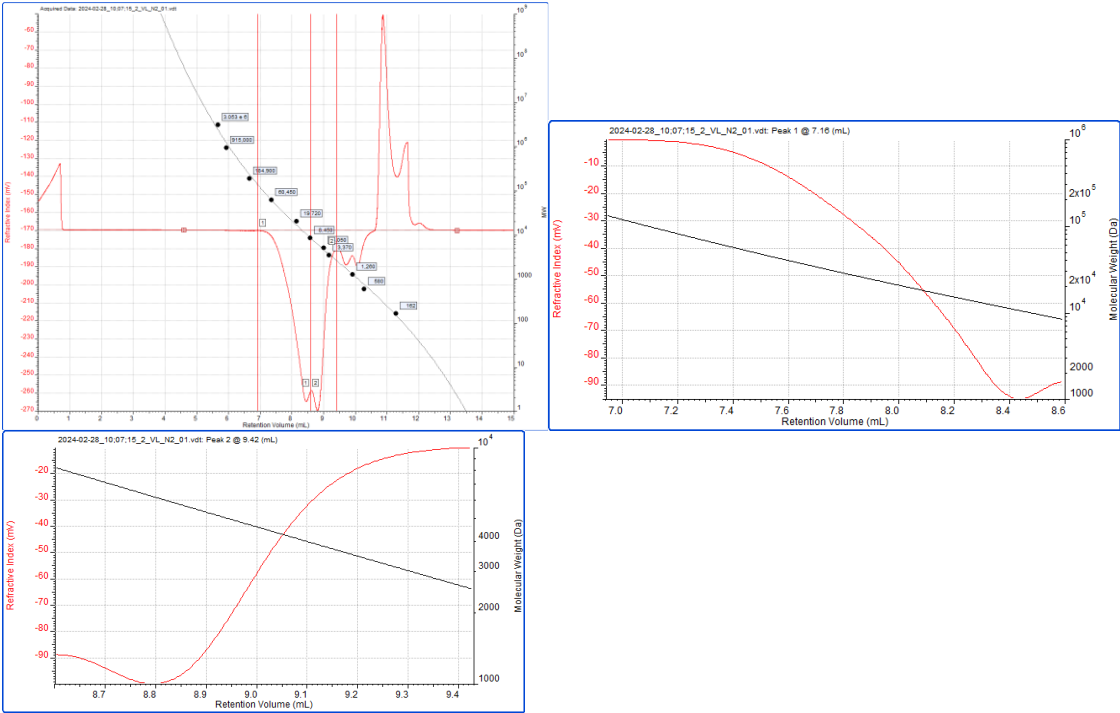

|                |                              |          |
|----------------|------------------------------|----------|
| Peak           | 1                            | 2        |
| Ret Vol (mL)   | 7.163                        | 9.423    |
| $M_n$ (Da)     | 13,903                       | 6,220    |
| $M_w$ (Da)     | 17,244                       | 6,568    |
| $M_z$ (Da)     | 23,745                       | 6,829    |
| $M_p$ (Da)     | 86,243                       | 2,529    |
| $M_w/M_n$      | 1.240                        | 1.056    |
| % Above 0      | 100.0000                     | 100.0000 |
| % Below 0      | 0.0000                       | 0.0000   |
| Wt Fr (Peak)   | 0.5668                       | 0.4332   |
| RI Area (mVmL) | -59.63                       | -45.58   |
| UV Area (mVmL) | 0.00                         | 0.00     |
| Method File    | Calibration01042019-0016.vcm |          |
| Solvent        | THF                          |          |
| Date Acquired  | Feb 28, 2024 - 10:07:15      |          |

Acquisition Operator admin : Administrator

Calculation Operator admin : Administrator

Column Set GMHxl

System System 1

Flow Rate (ml/min) 1.0000

Injection Volume (ul) 100.0

Volume Increment (mL) 0.0033

Detector Temp (C) 22.00

Column Temp (C) 22.00

OmniSEC Version 467

**Figure S38.** GPC trace for PVL using 2 under N<sub>2</sub> (run 3, Table 5).

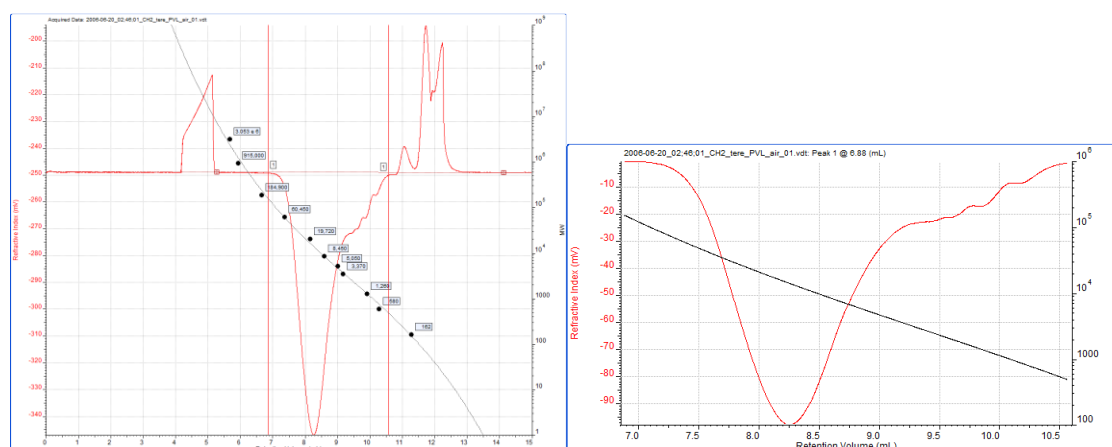

Peak 1

Ret Vol (mL) 6.880

M<sub>n</sub> (Da) 27,478

M<sub>w</sub> (Da) 74,502

M<sub>z</sub> (Da) 98,414

M<sub>p</sub> (Da) 148,650

M<sub>w</sub>/M<sub>n</sub> 2.711

% Above 0 100.0000

% Below 0 0.0000

Wt Fr (Peak) 1.0000

RI Area (mVmL) -122.72

UV Area (mVmL) 0.00

Method File Calibration01042019-0016.vcm

Solvent THF

Date Acquired Jun 20, 2006 - 02:46:01

Acquisition Operator admin : Administrator

Calculation Operator admin : Administrator

|                       |          |
|-----------------------|----------|
| Column Set            | GMHx1    |
| System                | System 1 |
| Flow Rate (ml/min)    | 1.0000   |
| Injection Volume (ul) | 100.0    |
| Volume Increment (mL) | 0.0033   |
| Detector Temp (C)     | 22.00    |
| Column Temp (C)       | 22.00    |
| OmniSEC Version       | 467      |

**Figure S39.** GPC trace for PVL using **2** under air (run 4, Table 5).

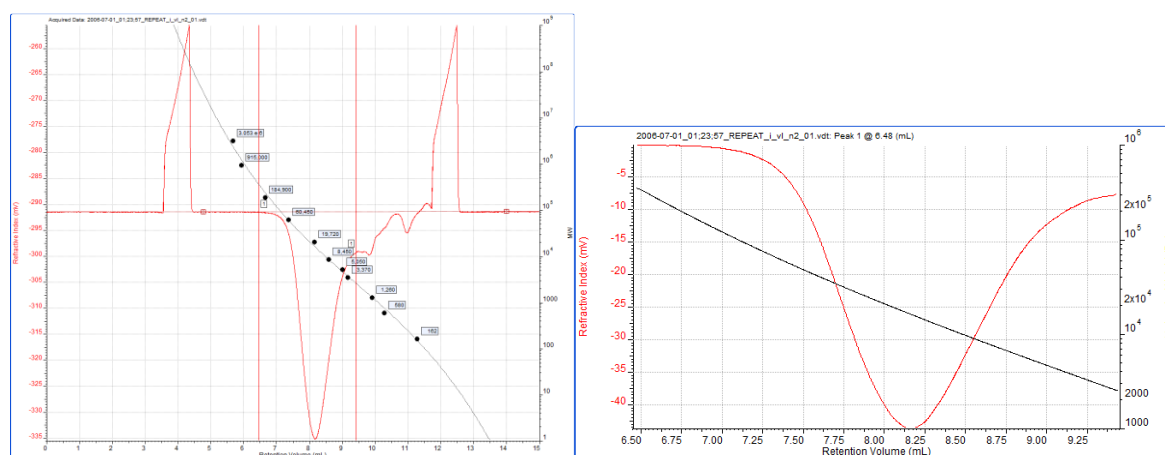

|                                |          |
|--------------------------------|----------|
| Peak 1                         |          |
| Ret Vol (mL)                   | 6.483    |
| M <sub>n</sub> (Da)            | 10,557   |
| M <sub>w</sub> (Da)            | 17,828   |
| M <sub>z</sub> (Da)            | 31,590   |
| M <sub>p</sub> (Da)            | 339,402  |
| M <sub>w</sub> /M <sub>n</sub> | 1.689    |
| % Above 0                      | 100.0000 |
| % Below 0                      | 0.0000   |
| Wt Fr (Peak)                   | 1.0000   |
| RI Area (mVmL)                 | -48.98   |
| UV Area (mVmL)                 | 0.00     |

|                       |                              |
|-----------------------|------------------------------|
| Method File           | Calibration01042019-0016.vcm |
| Solvent               | THF                          |
| Date Acquired         | Jul 01, 2006 - 01:23:57      |
| Acquisition Operator  | admin : Administrator        |
| Calculation Operator  | admin : Administrator        |
| Column Set            | GMHxl                        |
| System                | System 1                     |
| Flow Rate (ml/min)    | 1.0000                       |
| Injection Volume (ul) | 100.0                        |
| Volume Increment (mL) | 0.0033                       |
| Detector Temp (C)     | 22.00                        |
| Column Temp (C)       | 22.00                        |
| OmniSEC Version       | 467                          |

**Figure S40.** GPC trace for PVL using **I** under N<sub>2</sub> (run 7, Table 5).

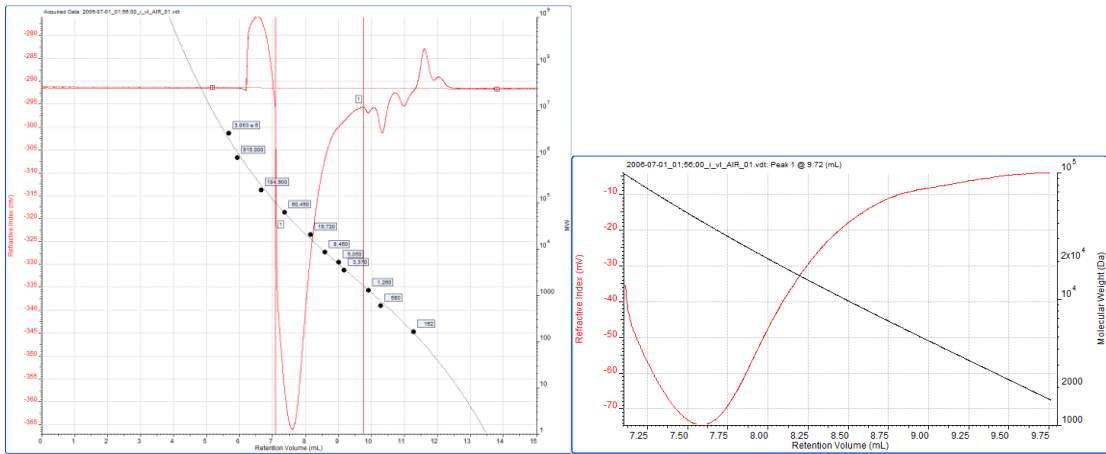

Peak 1  
Ret Vol (mL) 9.717  
M<sub>n</sub> (Da) 24,462  
M<sub>w</sub> (Da) 50,387  
M<sub>z</sub> (Da) 64,841  
M<sub>p</sub> (Da) 1,668  
M<sub>w</sub>/M<sub>n</sub> 2.060  
% Above 0 100.0000  
% Below 0 0.0000  
Wt Fr (Peak) 1.0000  
RI Area (mV/mL) -82.11  
UV Area (mV/mL) 0.00  
Method File Calibration01042019-0016.vcm  
Solvent THF  
Date Acquired Jul 01, 2006 - 01:56:00  
Acquisition Operator admin : Administrator  
Calculation Operator admin : Administrator  
Column Set GMHxl  
System System 1  
Flow Rate (ml/min) 1.0000  
Injection Volume (ul) 100.0  
Volume Increment (mL) 0.0033  
Detector Temp (C) 22.00  
Column Temp (C) 22.00  
OmniSEC Version 467

**Figure S41.** GPC trace for PVL using I under air (run 8, Table 5).

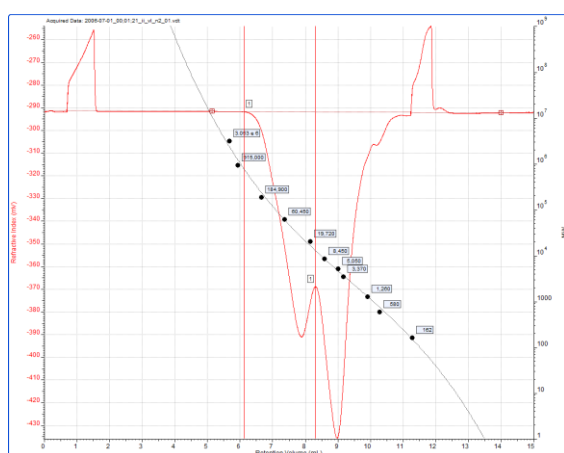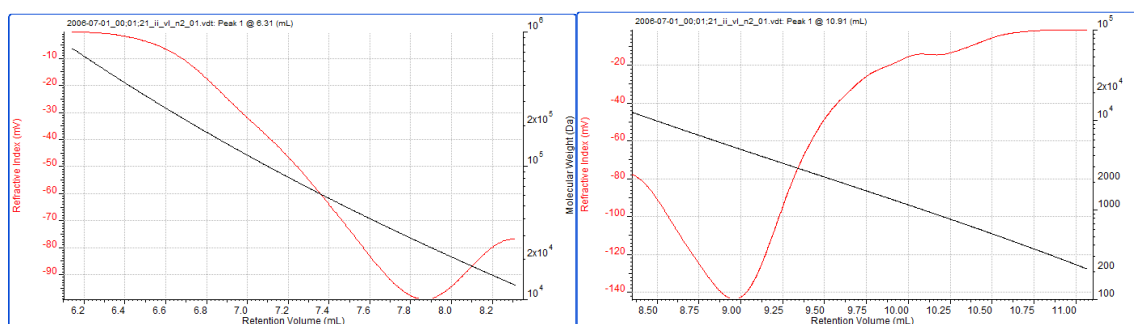

| Peak 1                                     | Peak 2   |
|--------------------------------------------|----------|
| Ret Vol (mL) 6.310                         | 10.913   |
| M <sub>n</sub> (Da) 29,398                 | 5,042    |
| M <sub>w</sub> (Da) 49,591                 | 7,431    |
| M <sub>z</sub> (Da) 100,924                | 8,653    |
| M <sub>p</sub> (Da) 499,314                | 276      |
| M <sub>w</sub> /M <sub>n</sub> 1.687       | 1.474    |
| % Above 0 100.0000                         | 100.0000 |
| % Below 0 0.0000                           | 0.0000   |
| Wt Fr (Peak) 1.0000                        | 1.0000   |
| RI Area (mVmL) -106.15                     | -143.05  |
| UV Area (mVmL) 0.00                        | 0.00     |
| Method File Calibration01042019-0016.vcm   |          |
| Solvent THF                                |          |
| Date Acquired Jul 01, 2006 - 00:01:21      |          |
| Acquisition Operator admin : Administrator |          |
| Calculation Operator admin : Administrator |          |
| Column Set GMHxl                           |          |
| System System 1                            |          |
| Flow Rate (ml/min) 1.0000                  |          |
| Injection Volume (ul) 100.0                |          |
| Volume Increment (mL) 0.0033               |          |
| Detector Temp (C) 22.00                    |          |
| Column Temp (C) 22.00                      |          |
| OmniSEC Version 467                        |          |

**Figure S42.** GPC trace for PVL using **II** under N<sub>2</sub> (run 9, Table 5).

### Expansions of MALDI-ToF spectra of the PVL obtained from **1** - **3**

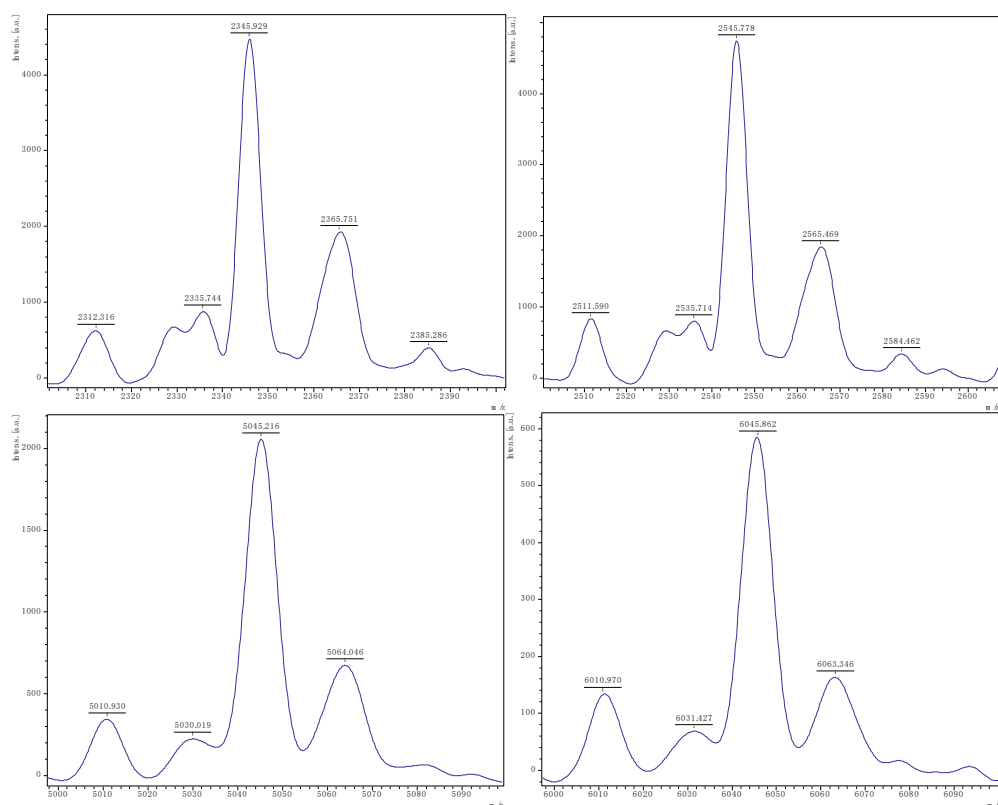

**Figure S43.** Expansions of the PVL using **1** (Entry 1, Table 5).

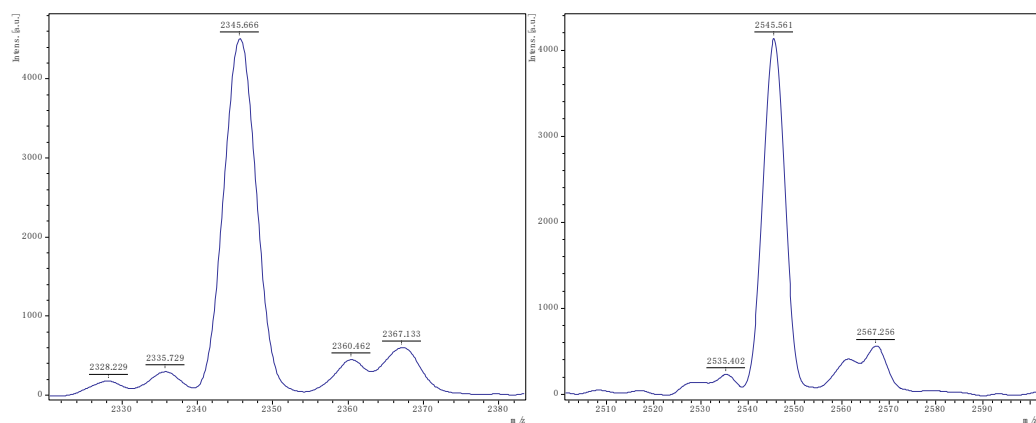

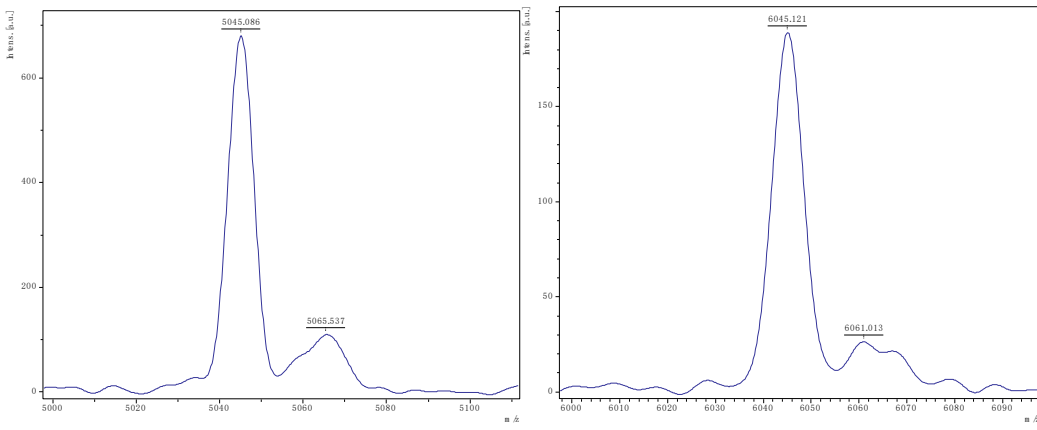

**Figure S44.** Expansions of the PVL using 2 (Entry 4, Table 5).

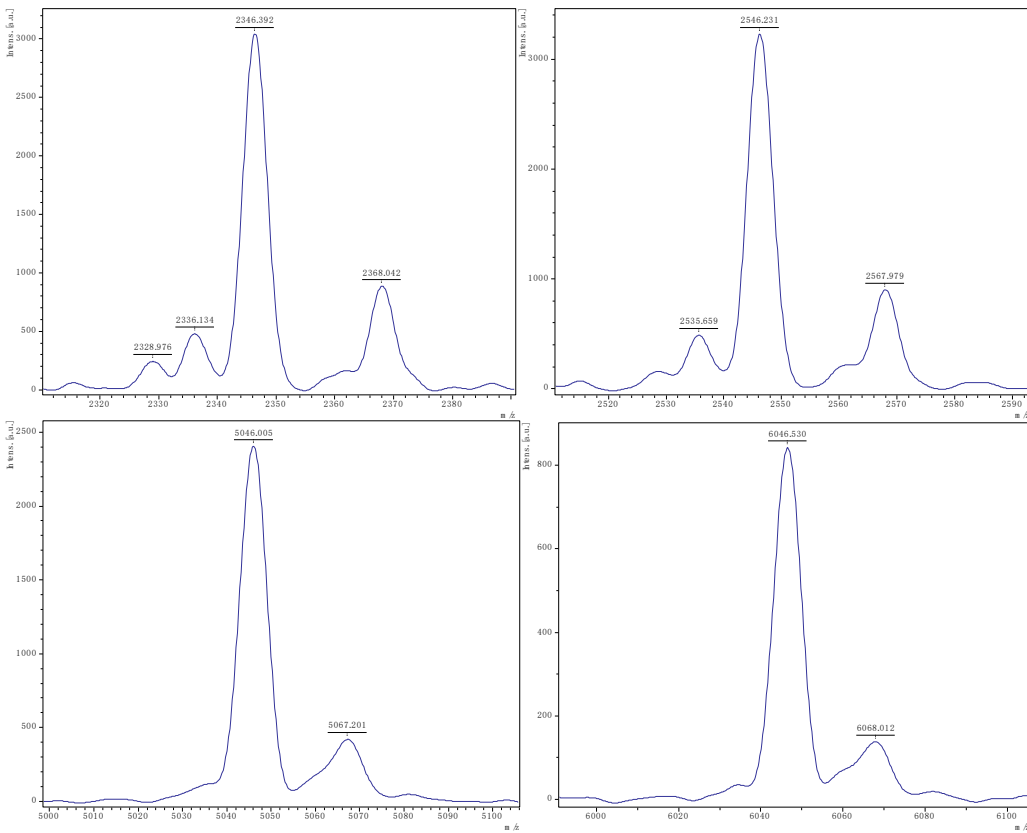

**Figure S45.** Expansions of the PVL using 3 (Entry 5, Table 5).

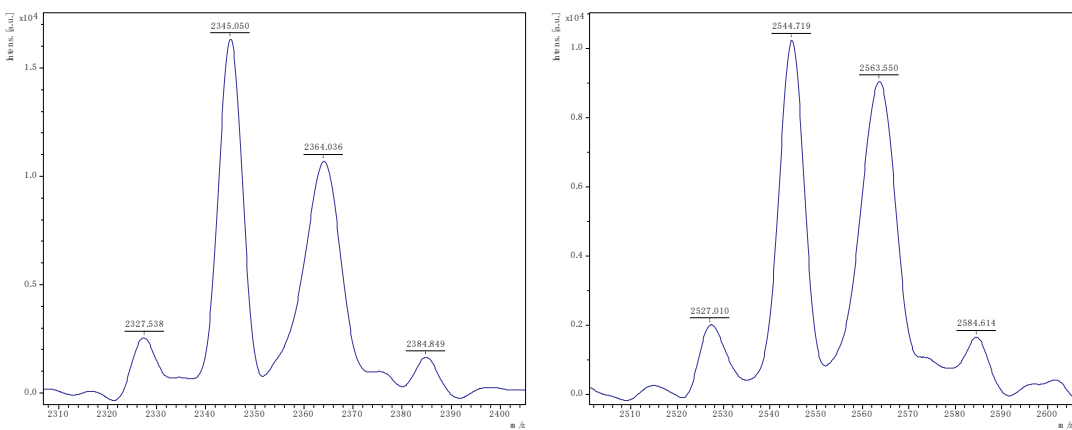

**Figure S46.** Expansions of the PVL using **II** (Entry 9, Table 5).

*MALDI-ToF spectra of polyvalerolactone obtained using the dianilines [2,2'-(NH<sub>2</sub>)C<sub>6</sub>H<sub>4</sub>]<sub>2</sub>(CH<sub>2</sub>)<sub>n</sub> (n = 0, 1, 2)*

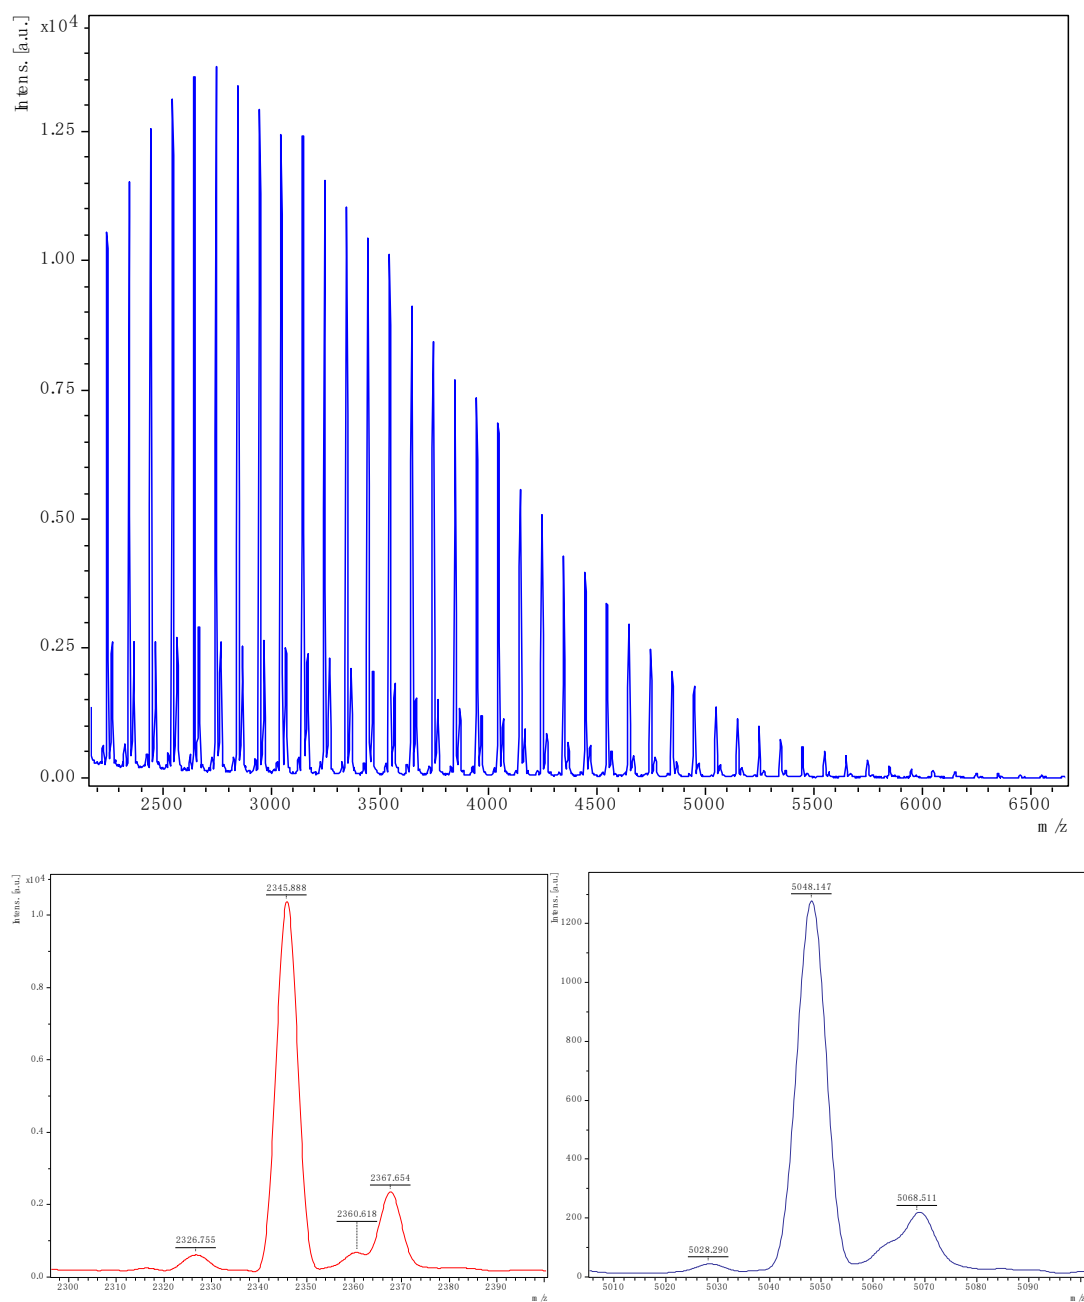



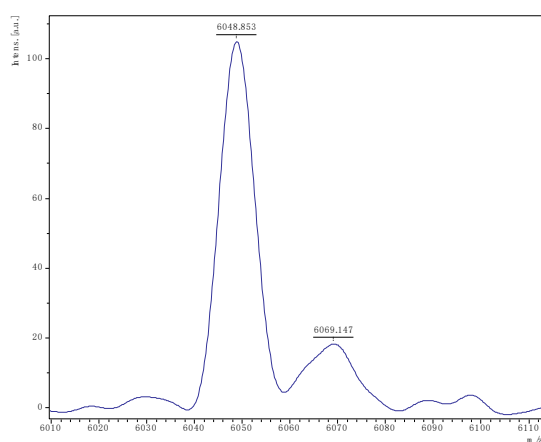

**Figure 47.** MALDI-ToF of PVL using  $[2,2'\text{-NH}_2(\text{C}_6\text{H}_4)]_2$  (run 11, Table 5).

Main families are chain polymer (terminated by 2 OH) as sodium adducts  $[M = 17 (\text{OH}) + 1(\text{H}) + n \times 100.12 (\text{VL}) + 22.99 (\text{Na}^+)]$  (e.g., for  $n = 23$ , calc. 2343.8, obsv. 2345.9 offset by 2.1 Da; ii) cyclic polymers as the potassium adducts e.g.,  $n = 50$  calc. 5045.1, obsv. 5048.1;  $n = 60$  calc. 6046.3, obsv. 6048.8 offset by 2 to 3 Da.

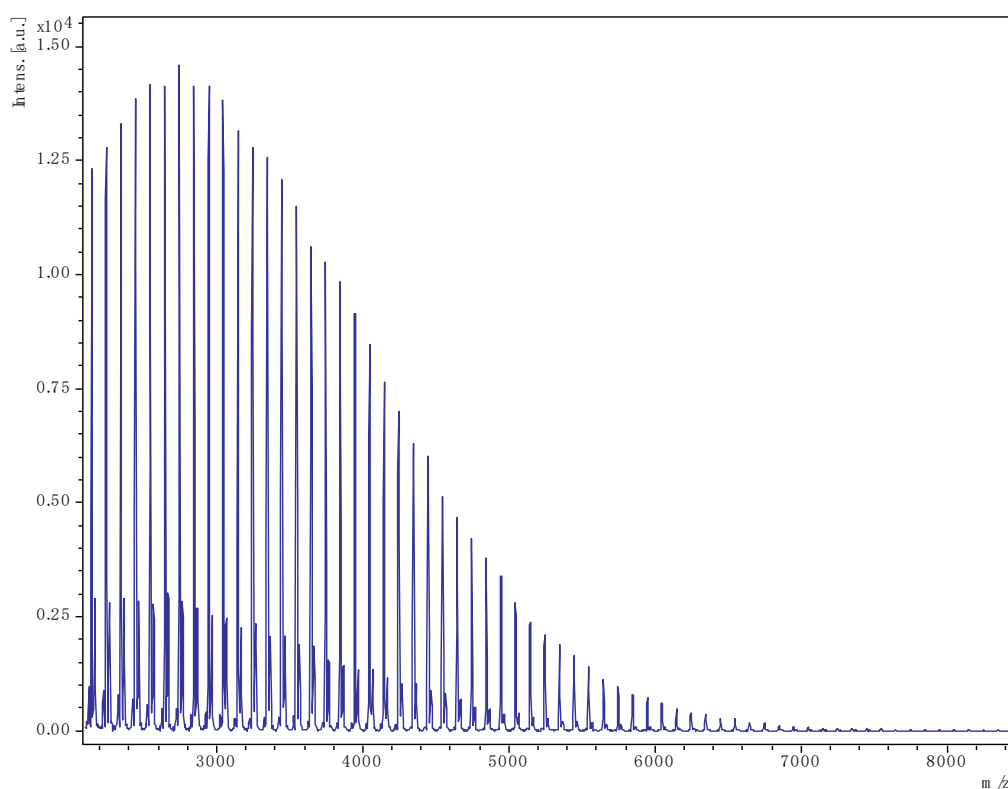

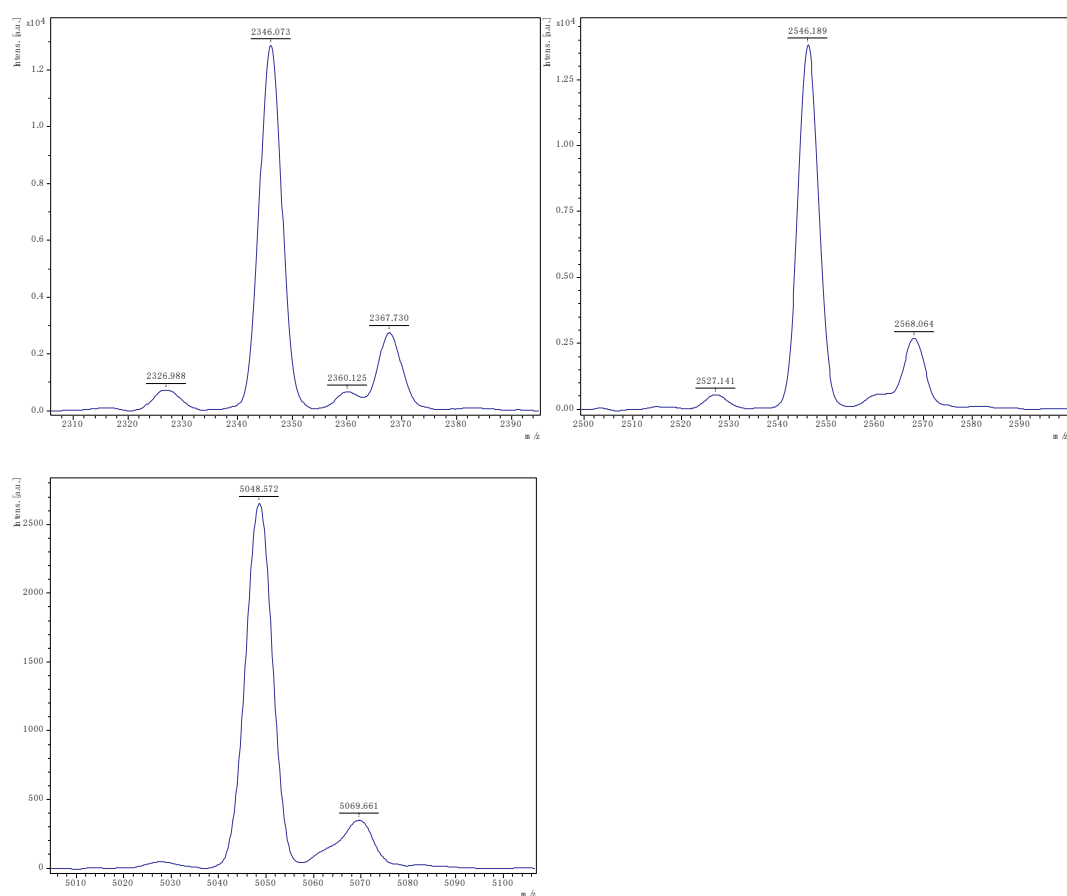

**Figure S48.** MALDI-ToF of PVL using  $[2,2'-(\text{NH}_2)\text{C}_6\text{H}_4]_2\text{CH}_2$  (run 12, Table 5).

The main families are i) chain polymer (terminated by 2 OH) as sodium adducts  $[\text{M} = 17 (\text{OH}) + 1(\text{H}) + n \times 100.12 (\text{VL}) + 22.99 (\text{Na}^+)]$  (e.g., for  $n = 23$ , calc. 2343.8, obsv. 2346.1;  $n = 25$  calc. 2544.0, obsv. 2546 with peaks off-set by about 2 Da; ii) cyclic polymers as the potassium adducts e.g.,  $n = 50$  calc. 5045.1, obsv. 5048.6).

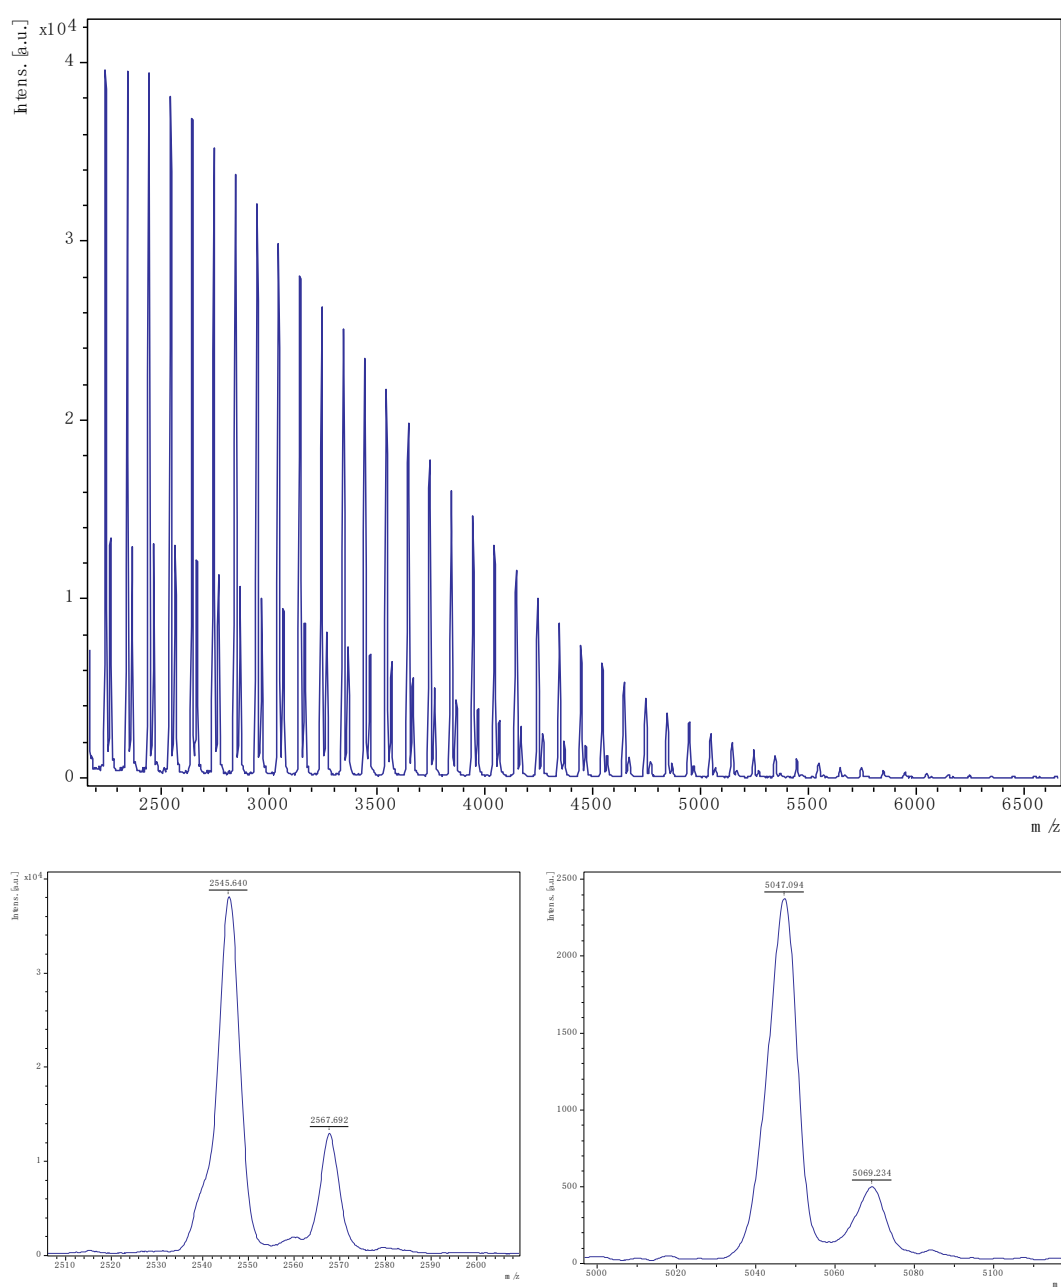

**Figure S49.** MALDI-ToF of PVL using [2,2'-(NH<sub>2</sub>)C<sub>6</sub>H<sub>4</sub>]<sub>2</sub>CH<sub>2</sub>CH<sub>2</sub> (run 13, Table 5).

The main families are i) chain polymer (terminated by 2 OH) as sodium adducts [ $M = 17 \text{ (OH)} + 1 \text{ (H)} + n \times 100.12 \text{ (VL)} + 22.99 \text{ (Na}^+)$ ] (e.g.,  $n = 25$  calc. 2544.0, obsv. 2545.6 with peaks off-set by 1.6 Da; ii) cyclic polymers as the potassium adducts e.g.,  $n = 50$  calc. 5045.1, obsv. 5047.1).

### Spectra of PVL obtained using anthranilic acid

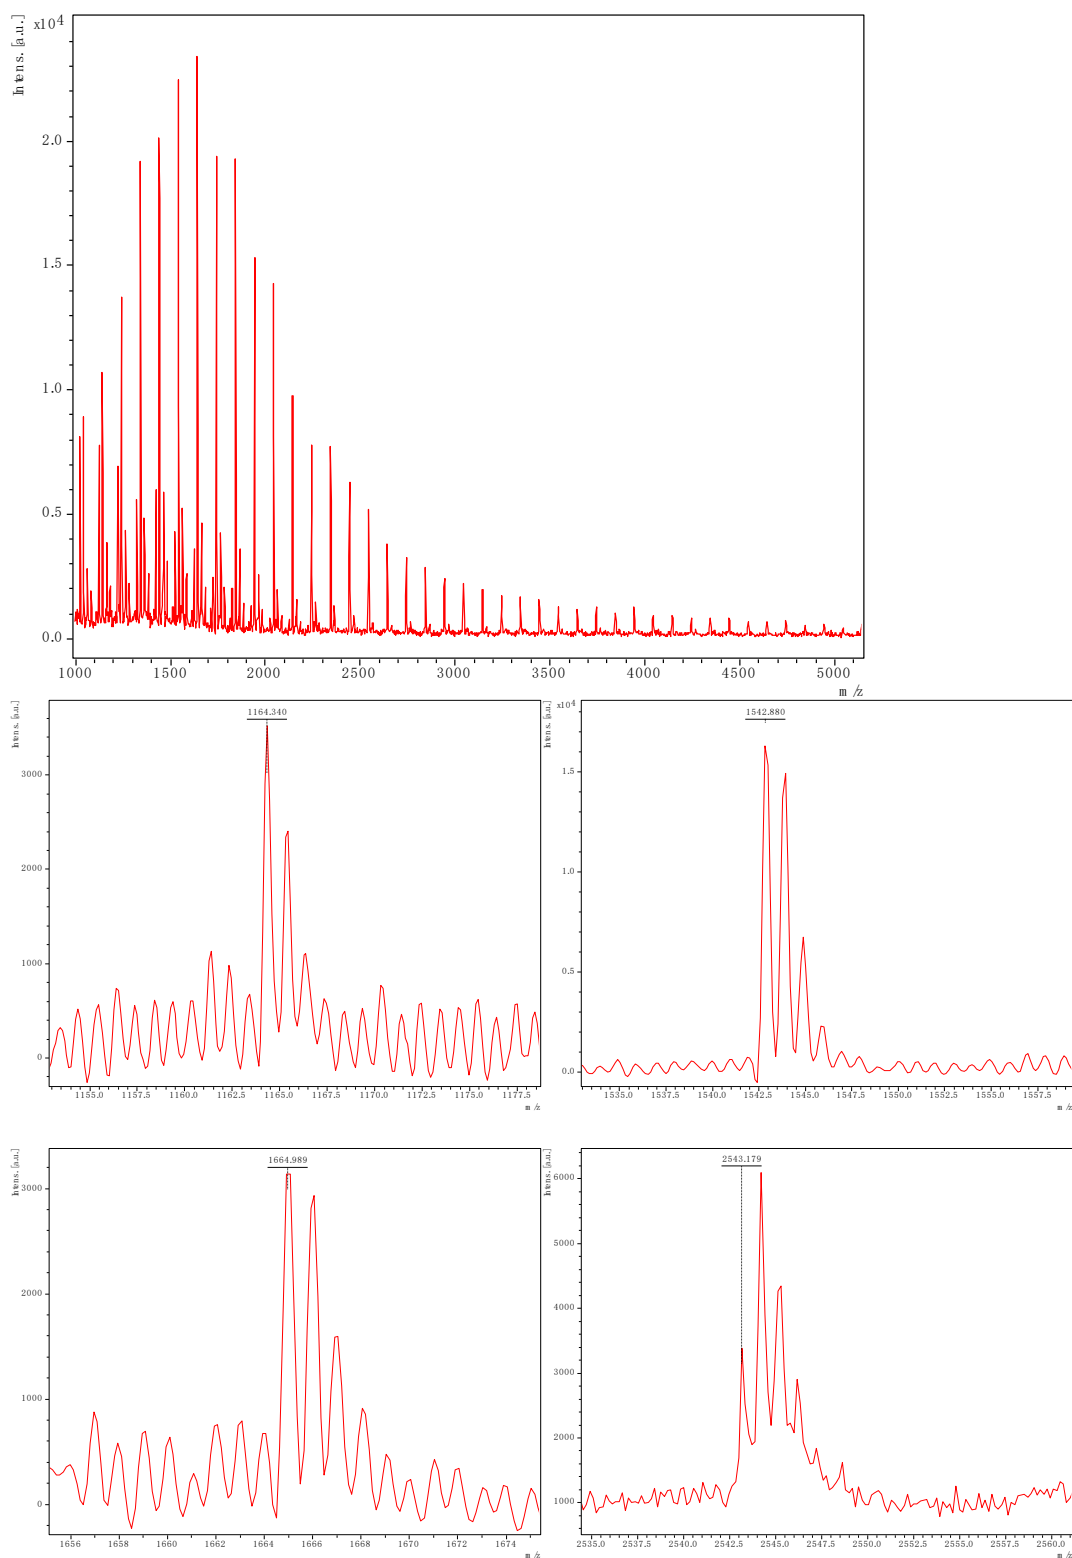

**Figure S50.** MALDI-ToF of PVL using 1,2-(NH<sub>2</sub>)(CO<sub>2</sub>H)C<sub>6</sub>H<sub>4</sub> (run 14, Table 5).

The main families are i) polymers (terminated by OH/1,2-(NH<sub>2</sub>)(CO<sub>2</sub>)C<sub>6</sub>H<sub>4</sub> as the sodium adducts e.g.,  $n = 10$  calc. 1161.3, obsv. 1164.5,  $n = 15$  calc. 1661.9, obsv. 1664.9 offset by 3 – 3.2Da); ii) chain polymer (terminated by 2 OH) as sodium adducts  $[M = 17 \text{ (OH)} + 1 \text{ (H)} + n \times 100.12 \text{ (VL)} + 22.99$

(Na<sup>+</sup>)] (e.g., n = 15 calc. 1542.8, obsv. 1542.9, n = 25 calc. 2544.0, obsv. 2543.2; iii) and/or cyclic polymers as the potassium adducts e.g., n = 25 calc. 2542.1, obsv. 2543.2).

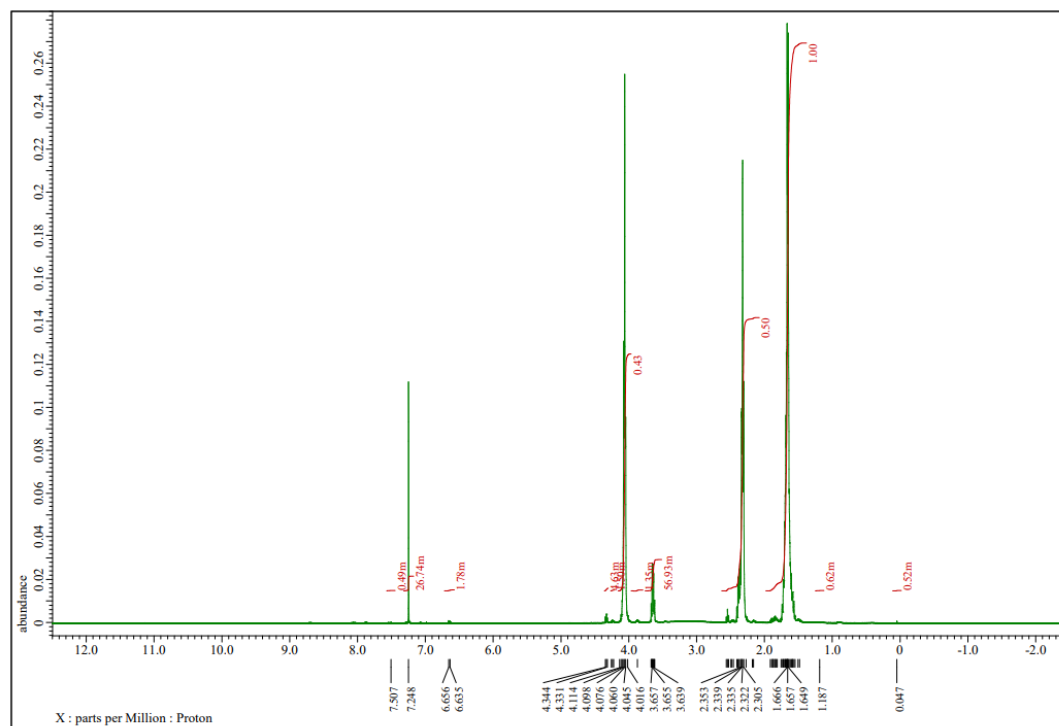

**Figure S51.** <sup>1</sup>H NMR spectrum of PVL using 1,2-(NH<sub>2</sub>)(CO<sub>2</sub>H)C<sub>6</sub>H<sub>4</sub> (run 14, Table 5).

## Catalyst stability

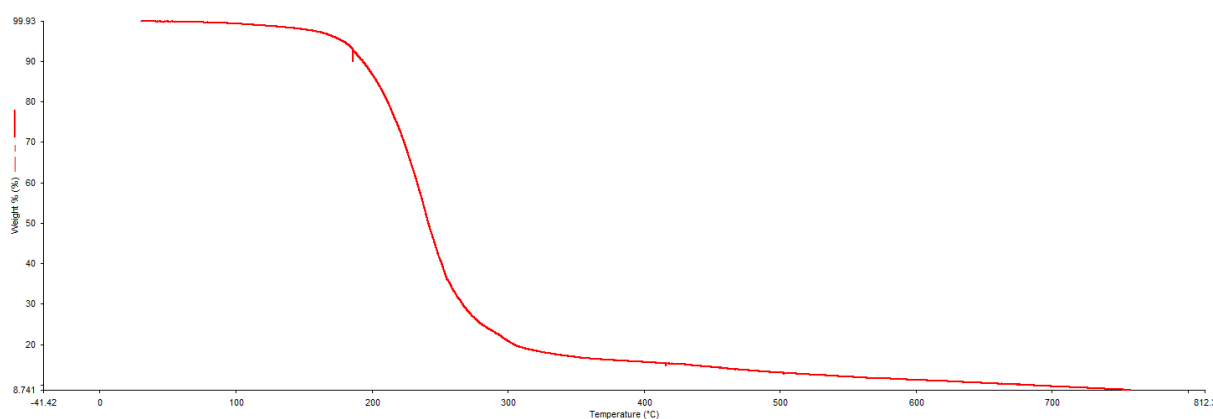

**Figure S52.** TGA for 2·3MeCN

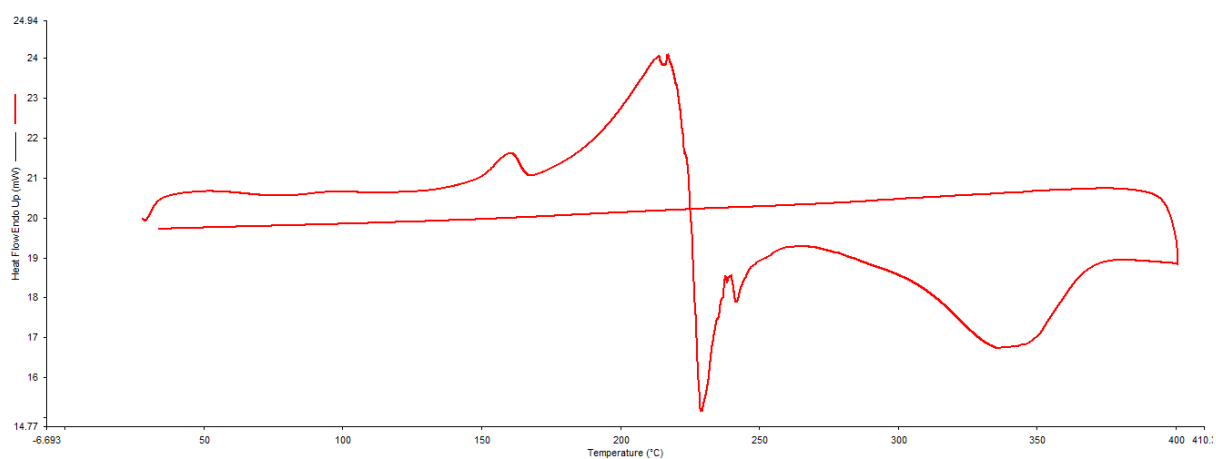

**Figure S53.** DSC for 2:3MeCN

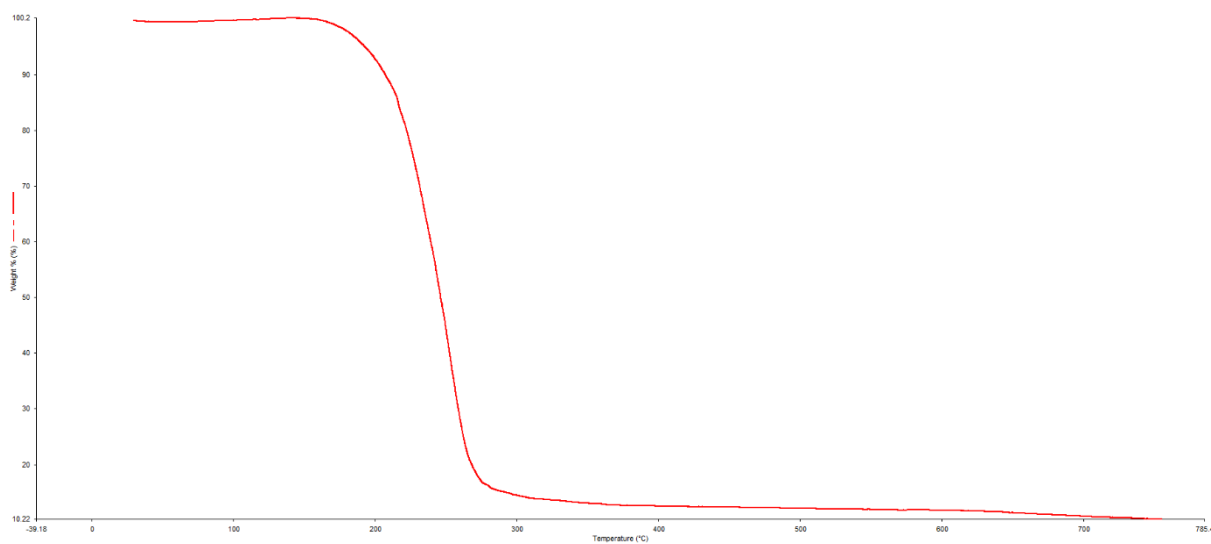

**Figure S54.** TGA for II.

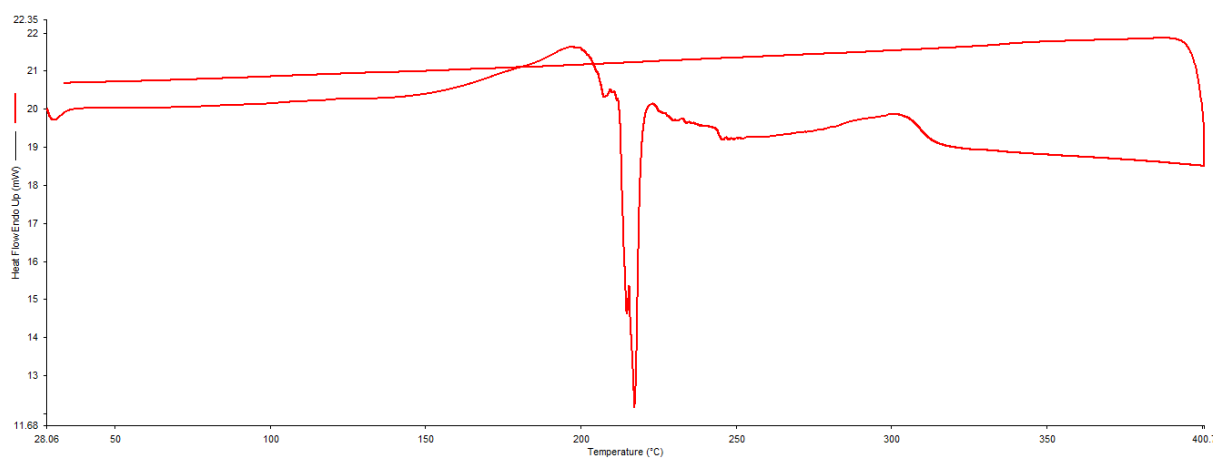

**Figure S55.** DSC for II.
